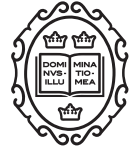

# First data release of the Hyper Suprime-Cam Subaru Strategic Program

Hiroaki AIHARA,<sup>1</sup> Robert ARMSTRONG,<sup>2</sup> Steven BICKERTON,<sup>3</sup> James BOSCH,<sup>2</sup> Jean COUPON,<sup>4</sup> Hisanori FURUSAWA,<sup>5</sup> Yusuke HAYASHI,<sup>5</sup> Hiroyuki IKEDA,<sup>5</sup> Yukiko KAMATA,<sup>5</sup> Hiroshi KAROJI,<sup>6,2</sup> Satoshi KAWANOMOTO,<sup>5</sup> Michitaro KOIKE,<sup>5</sup> Yutaka KOMIYAMA,<sup>5,7</sup> Dustin LANG,<sup>8,9</sup> Robert H. LUPTON,<sup>2</sup> Sogo MINEO,<sup>5</sup> Hironao MIYATAKE,<sup>10,11</sup> Satoshi MIYAZAKI,<sup>5,7</sup> Tomoki MOROKUMA,<sup>12,11</sup> Yoshiyuki OBUCHI,<sup>5</sup> Yukie OISHI,<sup>5</sup> Yuki OKURA,<sup>13,14</sup> Paul A. PRICE,<sup>2</sup> Tadafumi TAKATA,<sup>5,7</sup> Manobu M. TANAKA,<sup>15</sup> Masayuki TANAKA,<sup>5,\*</sup> Yoko TANAKA,<sup>16</sup> Tomohisa UCHIDA,<sup>15</sup> Fumihiro URAGUCHI,<sup>5</sup> Yousuke UTSUMI,<sup>17</sup> Shiang-Yu WANG,<sup>18</sup> Yoshihiko YAMADA,<sup>5</sup> Hitomi YAMANOI,<sup>5</sup> Naoki YASUDA,<sup>11</sup> Nobuo ARIMOTO,<sup>16,7</sup> Masashi CHIBA,<sup>19</sup> Francois FINET,<sup>16</sup> Hiroki FUJIMORI,<sup>20</sup> Seiji FUJIMOTO,<sup>21</sup> Junko FURUSAWA,<sup>5</sup> Tomotsugu GOTO,<sup>22</sup> Andy GOULDING,<sup>2</sup> James E. GUNN,<sup>2</sup> Yuichi HARIKANE,<sup>21,1</sup> Takashi HATTORI,<sup>16</sup> Masao HAYASHI,<sup>5</sup> Krzysztof G. HELMINIAK,<sup>23</sup> Ryo HIGUCHI,<sup>21,1</sup> Chiaki HIKAGE,<sup>11</sup> Paul T. P. HO,<sup>18,24</sup> Bau-Ching HSIEH,<sup>18</sup> Kuiyun HUANG,<sup>25</sup> Song HUANG,<sup>26,11</sup> Masatoshi IMANISHI,<sup>5,7</sup> Ikuru IWATA,<sup>16,7</sup> Anton T. JAELANI,<sup>19</sup> Hung-Yu JIAN,<sup>18</sup> Nobunari KASHIKAWA,<sup>5,7</sup> Nobuhiko KATAYAMA,<sup>11</sup> Takashi KOJIMA,<sup>21,1</sup> Akira KONNO,<sup>21</sup> Shintaro KOSHIDA,<sup>16</sup> Haruka KUSAKABE,<sup>27</sup> Alexie LEAUTHAUD,<sup>26</sup> Chien-Hsiu LEE,<sup>16</sup> Lihwai LIN,<sup>18</sup> Yen-Ting LIN,<sup>18</sup> Rachel MANDELBAUM,<sup>28</sup> Yoshiki MATSUOKA,<sup>5,29</sup> Elinor MEDEZINSKI,<sup>2</sup> Shoken MIYAMA,<sup>17,30</sup> Rieko MOMOSE,<sup>22</sup> Anupreeta MORE,<sup>11</sup> Surhud MORE,<sup>11</sup> Shiro MUKAE,<sup>21</sup> Ryoma MURATA,<sup>11,1</sup> Hitoshi MURAYAMA,<sup>11,31,32</sup> Tohru NAGAO,<sup>29</sup> Fumiaki NAKATA,<sup>16</sup> Mana NIIDA,<sup>33</sup> Hiroko NIIKURA,<sup>1,11</sup> Atsushi J. NISHIZAWA,<sup>34</sup> Masamune OGURI,<sup>35,11,1</sup> Nobuhiro OKABE,<sup>36,17</sup> Yoshiaki ONO,<sup>21</sup> Masato ONODERA,<sup>16</sup> Masafusa ONOUE,<sup>5,7</sup> Masami OUCHI,<sup>21,11</sup> Tae-Soo PYO,<sup>16</sup> Takatoshi SHIBUYA,<sup>21</sup> Kazuhiro SHIMASAKU,<sup>27,35</sup> Melanie SIMET,<sup>37</sup> Joshua SPEAGLE,<sup>38,11</sup> David N. SPERGEL,<sup>2,39</sup> Michael A. STRAUSS,<sup>2</sup> Yuma SUGAHARA,<sup>21,1</sup> Naoshi SUGIYAMA,<sup>40,11</sup> Yasushi SUTO,<sup>1,35</sup> Nao SUZUKI,<sup>11</sup> Philip J. TAIT,<sup>16</sup> Masahiro TAKADA,<sup>11</sup> Tsuyoshi TERAI,<sup>16</sup> Yoshiki TOBA,<sup>18</sup> Edwin L. TURNER,<sup>2,11,1</sup> Hisakazu UCHIYAMA,<sup>7</sup> Keiichi UMETSU,<sup>18</sup> Yuji URATA,<sup>41</sup> Tomonori USUDA,<sup>5,7</sup> Sherry YEH,<sup>16</sup> and Suraphong YUMA<sup>42</sup>

<sup>1</sup>Department of Physics, The University of Tokyo, 7-3-1 Hongo, Bunkyo-ku, Tokyo 113-0033, Japan

<sup>2</sup>Department of Astrophysical Sciences, Princeton University, 4 Ivy Lane, Princeton, NJ 08544, USA

<sup>3</sup>Orbital Insight, 100 W. Evelyn Ave. Mountain View, CA 94041, USA

<sup>4</sup>Department of Astronomy, University of Geneva, ch. d'Écogia 16, 1290 Versoix, Switzerland

- <sup>5</sup>National Astronomical Observatory of Japan, 2-21-1 Osawa, Mitaka, Tokyo 181-8588, Japan
- <sup>6</sup>National Institutes of Natural Sciences, 4-3-13 Toranomon, Minato-ku, Tokyo 105-0001, Japan
- <sup>7</sup>Department of Astronomy, School of Science, Graduate University for Advanced Studies (SOKENDAI), 2-21-1, Osawa, Mitaka, Tokyo 181-8588, Japan
- <sup>8</sup>Department of Astronomy and Astrophysics, University of Toronto, 50 St. George Street, Toronto, ON, M5S 3H4, Canada
- <sup>9</sup>Dunlap Institute for Astronomy and Astrophysics, University of Toronto, 50 St. George Street, Toronto, Ontario M5S 3H4, Canada
- <sup>10</sup>Jet Propulsion Laboratory, California Institute of Technology, Pasadena, CA 91109, USA
- <sup>11</sup>Kavli Institute for the Physics and Mathematics of the Universe (Kavli IPMU, WPI), The University of Tokyo, 5-1-5 Kashiwanoha, Kashiwa, Chiba 277-8583, Japan
- <sup>12</sup>Institute of Astronomy, The University of Tokyo, 2-21-1 Osawa, Mitaka, Tokyo 181-0015, Japan
- <sup>13</sup>RIKEN High Energy Astrophysics Laboratory, 2-1 Hirosawa, Wako, Saitama 351-0198, Japan
- <sup>14</sup>RIKEN BNL Research Center, Bldg. 510A, 20 Pennsylvania Street, Brookhaven National Laboratory, Upton, NY 11973, USA
- <sup>15</sup>Institute of Particle and Nuclear Studies, High Energy Accelerator Research Organization, 203-1 Shirakata, Tokai-mura, Naka-gun, Ibaraki 319-1106, Japan
- <sup>16</sup>Subaru Telescope, National Astronomical Observatory of Japan, 650 N. A'ohoku Pl, Hilo, HI 96720, USA
- <sup>17</sup>Hiroshima Astrophysical Science Center, Hiroshima University, 1-3-1 Kagamiyama, Higashi-Hiroshima, Hiroshima 739-8526, Japan
- <sup>18</sup>Academia Sinica Institute of Astronomy and Astrophysics, P.O. Box 23-141, Taipei 10617, Taiwan
- <sup>19</sup>Astronomical Institute, Tohoku University, 6-3, Aramaki, Aoba-ku, Sendai, Miyagi 980-8578, Japan
- <sup>20</sup>Meisei Electric Co., Ltd, 2223 Naganuma, Isesaki, Gumma 372-8585, Japan
- <sup>21</sup>Institute for Cosmic Ray Research, The University of Tokyo, 5-1-5 Kashiwanoha, Kashiwa, Chiba 277-8582, Japan
- <sup>22</sup>Institute of Astronomy, National Tsing Hua University, 101, Section 2 Kuang-Fu Road, Hsinchu, Taiwan, 30013, R.O.C.
- <sup>23</sup>Department of Astrophysics, Nicolaus Copernicus Astronomical Center, ul. Rabiańska 8, 87-100 Toruń, Poland
- <sup>24</sup>East Asian Observatory, 660 N. A'ohoku Place, University Park, Hilo, HI 96720, USA
- <sup>25</sup>Department of Mathematics and Science, National Taiwan Normal University, Lin-kou District, New Taipei City 24449, Taiwan
- <sup>26</sup>Department of Astronomy and Astrophysics, University of California, Santa Cruz, 1156 High Street, Santa Cruz, CA 95064, USA
- <sup>27</sup>Department of Astronomy, Graduate School of Science, The University of Tokyo, 7-3-1 Hongo, Bunkyo, Tokyo 113-0033, Japan
- <sup>28</sup>McWilliams Center for Cosmology, Department of Physics, Carnegie Mellon University, Pittsburgh, PA 15213, USA
- <sup>29</sup>Research Center for Space and Cosmic Evolution, Ehime University, 2-5 Bunkyo-cho, Matsuyama, Ehime 790-8577, Japan
- <sup>30</sup>Center for Planetary Science, Integrated Research Center of Kobe University, 7-1-48, Minamimachi, Minatojima, Chuo-ku, Kobe 650-0047, Japan
- <sup>31</sup>Department of Physics and Center for Japanese Studies, University of California, Berkeley, CA 94720, USA
- <sup>32</sup>Theoretical Physics Group, Lawrence Berkeley National Laboratory, MS 50A-5104, Berkeley, CA 94720, USA
- <sup>33</sup>Graduate School of Science and Engineering, Ehime University, Bunkyo-cho 2-5, Matsuyama, Ehime 790-8577, Japan
- <sup>34</sup>Institute for Advanced Research, Nagoya University, Furocho, Chikusa-ku, Nagoya, Aichi 464-8602, Japan

<sup>35</sup>Research Center for the Early Universe, The University of Tokyo, 7-3-1 Hongo, Bunkyo-ku, Tokyo 113-0033, Japan

<sup>36</sup>Department of Physical Science, Hiroshima University, 1-3-1 Kagamiyama, Higashi-Hiroshima, Hiroshima 739-8526, Japan

<sup>37</sup>University of California, Riverside, 900 University Avenue, Riverside, CA 92521, USA

<sup>38</sup>Harvard University, 60 Garden St., Cambridge, MA 02138, USA

<sup>39</sup>Center for Computational Astrophysics, Flatiron Institute, 162 5th Ave., New York, NY 10010, USA

<sup>40</sup>Department of Physics and Astrophysics, Nagoya University, Furocho, Chikusa-ku, Nagoya, Aichi 464-8602, Japan

<sup>41</sup>Institute of Astronomy, National Central University, Chung-Li 32054, Taiwan

<sup>42</sup>Department of Physics, Faculty of Science, Mahidol University, Bangkok 10400, Thailand

\*E-mail: [masayuki.tanaka@nao.ac.jp](mailto:masayuki.tanaka@nao.ac.jp)

Received 2017 April 5; Accepted 2017 July 22

## Abstract

The Hyper Suprime-Cam Subaru Strategic Program (HSC-SSP) is a three-layered imaging survey aimed at addressing some of the most important outstanding questions in astronomy today, including the nature of dark matter and dark energy. The survey has been awarded 300 nights of observing time at the Subaru Telescope, and it started in 2014 March. This paper presents the first public data release of HSC-SSP. This release includes data taken in the first 1.7 yr of observations (61.5 nights), and each of the Wide, Deep, and UltraDeep layers covers about 108, 26, and 4 square degrees down to depths of  $i \sim 26.4$ ,  $\sim 26.5$ , and  $\sim 27.0$  mag, respectively ( $5\sigma$  for point sources). All the layers are observed in five broad bands (*grizy*), and the Deep and UltraDeep layers are observed in narrow bands as well. We achieve an impressive image quality of  $0''.6$  in the  $i$  band in the Wide layer. We show that we achieve 1%–2% point spread function (PSF) photometry (root mean square) both internally and externally (against Pan-STARRS1), and  $\sim 10$  mas and 40 mas internal and external astrometric accuracy, respectively. Both the calibrated images and catalogs are made available to the community through dedicated user interfaces and database servers. In addition to the pipeline products, we also provide value-added products such as photometric redshifts and a collection of public spectroscopic redshifts. Detailed descriptions of all the data can be found online. The data release website is <https://hsc-release.mtk.nao.ac.jp>.

**Key words:** astronomical databases — cosmology: observations — galaxies: general — surveys

## 1 Introduction

Hyper Suprime-Cam (HSC; Miyazaki et al. 2012, 2018) is an optical imaging camera installed at the prime focus of the Subaru Telescope. It offers the widest field of view,  $1.5^\circ$  diameter, on existing 8–10 m-class telescopes; combined with the telescope aperture, HSC is currently the most efficient survey instrument in terms of étendue, which is defined as the product of telescope aperture squared and the area of the field of view. The focal plane is filled with 116 full-depletion Hamamatsu CCDs, of which 104 are used for science and the remaining 12 are for guiding and focusing. Each CCD has  $2048 \times 4096$  pixels and each pixel subtends  $0''.168$  on the sky ( $15 \mu\text{m}$  physical). These CCDs are  $200 \mu\text{m}$  thick and are very sensitive even at  $\sim 1 \mu\text{m}$ , making deep

imaging at such long wavelengths possible. An overview of the camera and results from engineering runs can be found in Miyazaki et al. (2018). Details of the dewar system are given in Komiyama et al. (2018). HSC has five broad-band filters, *grizy*, as well as a number of narrow-band filters designed to study emission line objects at high redshifts. Kawanomoto et al. (2017) describe detailed measurements of the system response functions.

A large imaging survey with HSC is being conducted as a Subaru Strategic Program (SSP). The survey is led by an international collaboration of the Japanese community, Taiwan, and Princeton University. We have been awarded 300 nights over 5–6 yr, which is the largest program ever approved at the Subaru Telescope. The goal of the survey is

to address outstanding astrophysical questions such as the nature of dark matter and dark energy, the cosmic reionization, and galaxy evolution over cosmic time. Due to the legacy value of the survey data, it also allows us to tackle other important scientific questions in many areas of astrophysics. The HSC-SSP website<sup>1</sup> gives details of our science goals.

As described in the survey description paper (Aihara et al. 2018), and also on the HSC-SSP website, the survey consists of three layers: Wide, Deep, and UltraDeep. The Wide survey aims to cover 1400 square degrees of the sky in all five broad-band filters (*grizy*). The survey fields are mostly located around the equator; two long stripes around the spring and autumn equator with an additional stripe around the Hectomap region (Geller et al. 2011). The integration times are 10 min in *gr* and 20 min in *izy* broken into four (*gr*) and six (*izy*) dithers, going down to  $i \sim 26$  at  $5\sigma$  for point sources (see the next section for details about the depths). We also take a 30 s exposure to increase the dynamic range at the bright end. We apply a large dither ( $\sim 1/3$  of the field of view) between exposures to ensure uniform coverage. Priority is given to *i*-band observations when the seeing is good ( $\lesssim 0''.75$ ), in order to carry out precise shape measurements for weak-lensing science.

The Deep survey has four separate fields: XMM-LSS, Extended-COSMOS (E-COSMOS), ELAIS-N1, and DEEP2-F3. These fields are widely separated in RA and at least one of them is observable in any observing runs. Each field consists of four HSC pointings, except for XMM-LSS which is three pointings, amounting to about 27 square degrees in total for the four fields. Our goal is to expose for a few hours in the broad bands as well as in three narrow-band filters: *NB387*, *NB816*, and *NB921* (the numbers indicate the central wavelength in nm). We aim to reach  $i \sim 27$ , and the target exposure times are given in the next section. We apply a small five-point dither,  $150''$  in RA and  $75''$  in Dec, on top of a larger random dither with  $r < 450''$  from the fiducial center. The larger dither is needed to have the same objects on different CCDs for better calibration. A 30 s exposure is taken in each field, as is done for the Wide layer.

The UltraDeep layer has two fields, COSMOS and SXDS (or equivalently UDS), with one pointing each. We aim to obtain very deep images of these fields both in the broad- and narrow-band filters (*NB816*, *NB921*, *NB101*), reaching down to  $i \sim 28$ . We repeatedly visit these fields in order to enable transient science. The dither pattern is the same as for the Deep layer. When the seeing is very bad ( $> 1''.3$ ), we tend to observe the UltraDeep fields so the data can be useful for transient science.

This paper presents the first public data release of the HSC-SSP, which includes data from the first 1.7 yr of observation. We first give an overview of the release in section 2. We then move on to describe the data processing and resultant data products in sections 3 and 4, respectively. Section 5 presents a number of quality assurance tests as well as a list of known problems in our data. Section 6 briefly describes our catalog and image archive servers, followed by our plans for future data releases in section 7. Finally, the paper is summarized in section 8.

## 2 Overview of the release

### 2.1 The release

This data release includes HSC data taken between 2014 March and 2015 November over a total of 61.5 nights. The data are processed with hscPipe (Bosch et al. 2018), a version of the Large Synoptic Survey Telescope (LSST) stack (Ivezic et al. 2008; Axelrod et al. 2010; Jurić et al. 2015), and both image and catalog products are made available to the community through dedicated database servers and user interfaces. The image products include photometrically and astrometrically calibrated CCD images, warped images, and coadds (we define the terminology in subsection 3.1). The catalog products include both forced and unforced measurements of object positions and object fluxes measured in various ways, together with measurement flags to indicate the reliability of the measurements. Precise galaxy shape measurements are withheld in this release because they are still being validated, but they will be released in a future incremental release (see section 7). The catalog FITS files that contain the shape measurements will also be made available in the same release. In addition to the pipeline products, value-added products such as photometric redshifts and a collection of public spectroscopic redshifts are available to the community.

The sky covered in this release is shown in figure 1. For convenience, we give names to each of the observed fields, as summarized in table 1. A figure of our survey geometry with footprints of some of the extant large imaging and spectroscopic surveys overlaid is available at the data release site. The Wide data cover about 108 square degrees of the sky, mostly around the equator in the five bands at the nominal survey depth. The Deep and UltraDeep data are shallower than the target depths but include the five broad bands over the full area, plus partial coverage in two narrow bands, *NB816* and *NB921*. Table 2 summarizes the approximate exposure time, seeing,  $5\sigma$  depth, and saturation magnitudes for point sources measured from the data, as well as target exposures and depths. As we will discuss in section 5, we use flux uncertainties from the coadds to estimate the depths,

<sup>1</sup> <http://hsc.mtk.nao.ac.jp/ssp/>.

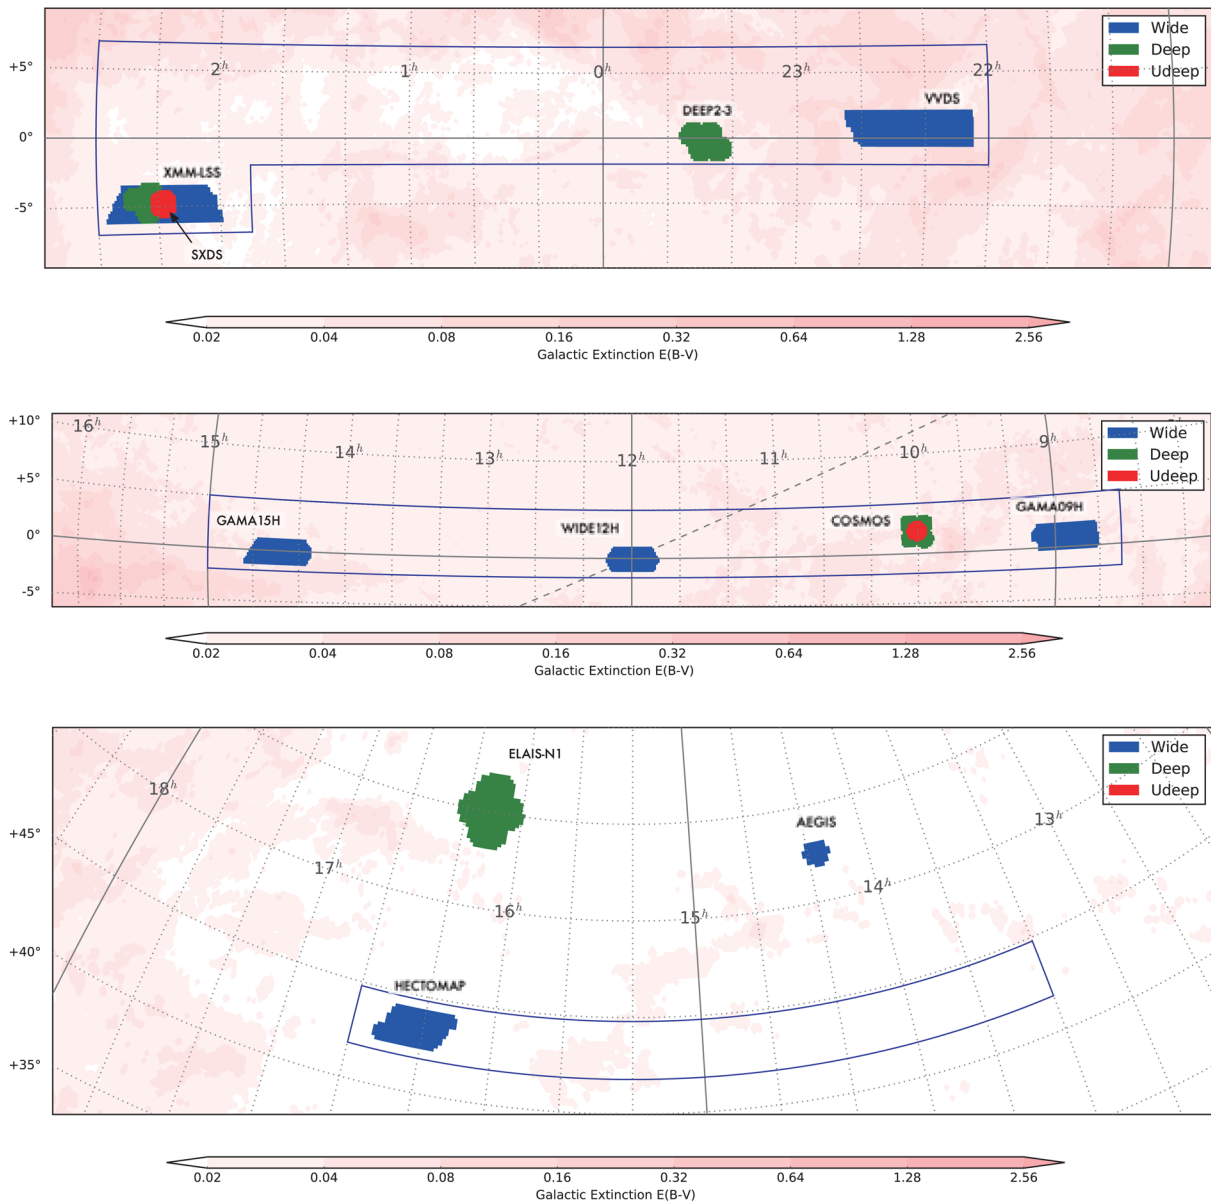

**Fig. 1.** Area covered in this release, shown in equatorial coordinates. The blue, green, and red areas show the Wide, Deep, and UltraDeep layers, respectively, included in the data release. The boxes indicate the approximate boundaries of the three disjoint regions that will make up the final Wide survey. Note that AEGIS is a calibration field observed at the Wide depth and is not formally a part of the Wide survey. The Galactic extinction map from Schlegel, Finkbeiner, and Davis (1998) is also shown as grayscale.

and the depth quoted here may be somewhat optimistic. As we discuss in subsection 5.6, the  $5\sigma$  limits roughly correspond to 50% completeness limits. Note as well that the seeing is derived from Gaussian-weighted moments (Bernstein & Jarvis 2002). In total, this release includes  $\sim 7 \times 10^7$  objects and the data volume exceeds 70 TB, as summarized in table 3. The data release site<sup>2</sup> describes in more detail the available data products as well as how to use our online/offline tools. In addition, the site maintains an up-to-date list of known problems (see subsection 5.8) and

frequently asked questions. Note that only the processed data are available at the data release site. The raw data are made available through SMOKA.<sup>3</sup>

## 2.2 Survey progress

Let us briefly discuss our survey progress so far. Figure 2 shows the growth of the number of visits (exposures; we will define our terminology in the next section) as a function of observing nights for the Wide layer. About 2/3 of

<sup>2</sup> (<https://hsc-release.mtk.nao.ac.jp/>).

<sup>3</sup> (<http://smoka.nao.ac.jp/>).



**Table 1.** List of the observed fields.\*

| Layer     | Field name        |
|-----------|-------------------|
| UltraDeep | COSMOS            |
| UltraDeep | SXDS              |
| Deep      | XMM-LSS           |
| Deep      | E(xtended)-COSMOS |
| Deep      | ELAIS-N1          |
| Deep      | DEEP2-3           |
| Wide      | XMM-LSS           |
| Wide      | GAMA09H           |
| Wide      | WIDE12H           |
| Wide      | GAMA15H           |
| Wide      | HECTOMAP          |
| Wide      | VVDS              |
| —         | AEGIS             |

\*AEGIS is observed as a photometric redshift calibration field at the Wide depth.

the total observing time is for the Wide survey and thus the Wide layer most directly shows our survey progress. Our progress is somewhat slower than expected. On average, we are about 10 nights behind the planned schedule. This is primarily due to the rather poor observing conditions in the early observing runs, and we hope the weather

cooperates in our future runs. We note that, in the early phase of the survey, fewer nights were allocated for SSP than originally planned because of operational reasons. The time allocation is increasing to catch up with the original plan.

Despite the small delay, the data we have collected thus far have exquisite quality. Figure 3 shows the seeing distribution of the acquired data. The seeing measured by the on-site reduction system (Furusawa et al. 2018) is used here. A significant fraction of our data are taken under seeing conditions better than  $0''.7$ . The  $g$  band is worse than the other bands but its median seeing is still  $0''.8$ . As described in the survey description paper (Aihara et al. 2018), we give priority to the  $i$ -band observations when the seeing is good, and the median seeing in the  $i$  band is  $0''.6$ . This is superior to the typical seeing achieved in the Dark Energy Survey ( $\sim 0''.9$ ; Dark Energy Survey Collaboration 2016), making more precise shape measurements as well as deeper imaging possible. The Kilo Degree Survey achieves similar seeing but is much shallower (de Jong et al. 2017). The combination of excellent seeing and depth is one of the strengths of our survey. We will elaborate on the depth of our data in subsection 5.6.

**Table 2.** Approximate exposure time, seeing,  $5\sigma$  depth for point sources, and saturation magnitudes (also for point sources) for each filter and survey layer.

| Wide                  | $g$  | $r$  | $i$  | $z$  | $y$  |                   |       |       |
|-----------------------|------|------|------|------|------|-------------------|-------|-------|
| Exposure (min)        | 10   | 10   | 20   | 20   | 20   |                   |       |       |
| Seeing ( $''$ )       | 0.72 | 0.67 | 0.56 | 0.63 | 0.64 |                   |       |       |
| Depth (mag)           | 26.8 | 26.4 | 26.4 | 25.5 | 24.7 |                   |       |       |
| Saturation (mag)      | 17.8 | 17.8 | 18.4 | 17.4 | 17.1 |                   |       |       |
| Target exposure (min) | 10   | 10   | 20   | 20   | 20   |                   |       |       |
| Target depth (mag)    | 26.8 | 26.4 | 26.2 | 25.4 | 24.7 |                   |       |       |
| Deep                  | $g$  | $r$  | $i$  | $z$  | $y$  | NB387             | NB816 | NB921 |
| Exposure (min)        | 20   | 15   | 30   | 35   | 20   | —                 | 45    | 60    |
| Seeing ( $''$ )       | 0.83 | 0.68 | 0.55 | 0.69 | 0.59 | —                 | 0.53  | 0.65  |
| Depth (mag)           | 26.8 | 26.6 | 26.5 | 25.6 | 24.8 | —                 | 25.9  | 25.6  |
| Saturation (mag)      | 17.9 | 18.2 | 18.8 | 17.6 | 17.3 | —                 | 17.2  | 17.0  |
| Target exposure (min) | 84   | 84   | 126  | 210  | 126  | 84                | 168   | 252   |
| Target depth (mag)    | 27.8 | 27.4 | 27.1 | 26.6 | 25.6 | 24.8              | 26.1  | 25.9  |
| UltraDeep             | $g$  | $r$  | $i$  | $z$  | $y$  | NB816 NB921 NB101 |       |       |
| Exposure (min)        | 70   | 70   | 130  | 130  | 210  | 200               | 270   | —     |
| Seeing ( $''$ )       | 0.74 | 0.62 | 0.64 | 0.59 | 0.74 | 0.60              | 0.76  | —     |
| Depth (mag)           | 27.4 | 27.3 | 27.0 | 26.4 | 25.6 | 26.3              | 25.8  | —     |
| Saturation (mag)      | 18.3 | 19.0 | 18.7 | 18.2 | 17.3 | 17.2              | 16.6  | —     |
| Target exposure (min) | 420  | 420  | 840  | 1134 | 1134 | 630               | 840   | 1050  |
| Target depth (mag)    | 28.4 | 28.0 | 27.7 | 27.1 | 26.6 | 26.8              | 26.5  | 25.1  |

\*For the Deep and UltraDeep layers, the numbers are for the data collected thus far and we expect to reach much deeper later in the survey. The target exposure times and expected depths are also shown for reference. Note that the expected depths are for point sources and are in reasonable agreement with the measured depths in the Wide layer. The  $5\sigma$  limiting mags within  $2''$  diameter apertures, which may be more relevant for extended sources, are shallower by 0.3 mag than the point source limits. The seeing measurements are derived from Gaussian-weighted moments of stars, transformed to FWHM by assuming a Gaussian profile. Note that there is a significant spatial variation of all the values listed here over the survey area.

**Table 3.** Summary of this public release and previous internal data releases.\*

| Release               | Date       | Layer     | Number of filters | Area (deg <sup>2</sup> ) | Files (TB) | Number of objects | hscPipe version |
|-----------------------|------------|-----------|-------------------|--------------------------|------------|-------------------|-----------------|
| Public Data Release 1 | 2017-02-28 | UltraDeep | 7                 | 4                        | 8.6        | 3225285           | 4.0.1           |
|                       |            | Deep      | 7                 | 26                       | 16.6       | 15959257          | 4.0.1           |
|                       |            | Wide      | 5                 | 108 (100)                | 57.1       | 52658163          | 4.0.1           |
| S14A0                 | 2014-09-04 | UltraDeep | 5                 | 2                        | 2.2        | 880792            | 2.12.4a         |
|                       |            | Wide      | 2                 | 24                       | 2.6        | 10548142          | 2.12.4a         |
| S14A0b                | 2015-02-10 | UltraDeep | 5                 | 4                        | 6.4        | 2183707           | 2.12.4d         |
|                       |            | Wide      | 5                 | 94 (23)                  | 18.6       | 63954672          | 3.4.1           |
| S15A                  | 2015-09-01 | UltraDeep | 6                 | 4                        | 7.2        | 2973579           | 3.8.5           |
|                       |            | Deep      | 6                 | 24                       | 17.7       | 14747568          | 3.8.5           |
|                       |            | Wide      | 5                 | 203 (82)                 | 40.7       | 64073662          | 3.8.5           |
| S15B                  | 2016-01-29 | UltraDeep | 7                 | 4                        | 8.6        | 3225285           | 4.0.1           |
|                       |            | Deep      | 7                 | 26                       | 16.6       | 15959257          | 4.0.1           |
|                       |            | Wide      | 5                 | 413 (111)                | 145.2      | 157423778         | 4.0.1           |
| S16A                  | 2016-08-04 | UltraDeep | 7                 | 4                        | 7.5        | 3208918           | 4.0.2           |
|                       |            | Deep      | 7                 | 28                       | 8.0        | 16269129          | 4.0.2           |
|                       |            | Wide      | 5                 | 456 (178)                | 245.0      | 183391488         | 4.0.2           |

\*The area is estimated by using the HEALPix index system ( $N_{\text{side}} = 2^{11}$ ) and mosaicking information from the pipeline processing. The fifth column gives the survey area in square degrees. The full-color full-depth area in the Wide survey is shown in parentheses. Only the full-color full-depth Wide area is included in this release, but the area in the brackets in the top row is smaller than the total area. This is primarily because the release area is determined on a patch-by-patch basis, but a fraction of the area in the patches on the field borders actually do not reach the full depth. The seventh column shows the number of objects. Since the deblender became functional in the S15A release, the numbers for the subsequent releases are for primary objects (`detect_is_primary = True`; see subsection 4.3).

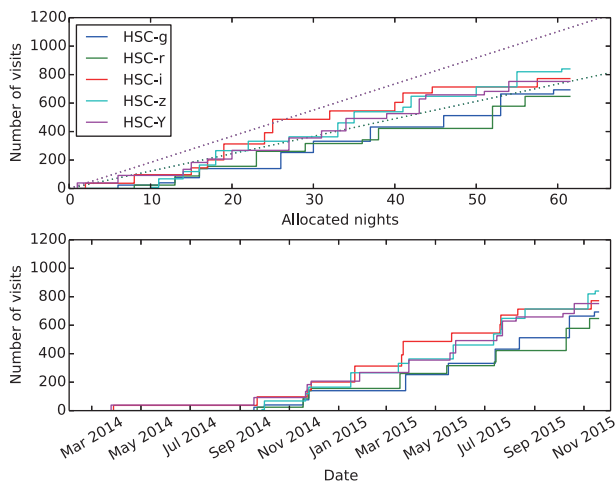

**Fig. 2.** Allocated number of nights and number of visits acquired. The top panel shows the cumulative number of visits for the Wide layer obtained as a function of the number of observing nights. The dashed lines indicate the average numbers of visits required to complete the survey in 300 nights in the *gr* (bottom line) and *izy* filters (top line), respectively. The bottom panel shows the cumulative number of visits as a function of time. (Color online)

Figure 4 shows the airmass distribution of our observations. Most of the visits are taken around  $60^\circ$  (airmass  $\sim 1.2$ ), but there is a tail towards lower elevation. Most of our fields are located around the celestial equator and they do not go above  $\sim 70^\circ$  elevation.

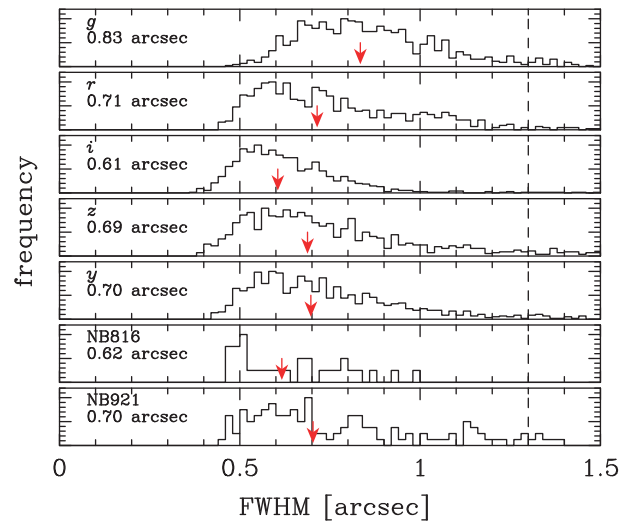

**Fig. 3.** Seeing distribution of individual visits for each filter. The seeing measured by the on-site system is used and only visits with sky transparency greater than 0.3 are plotted here (note that only data with transparency  $> 0.3$  are used in the main processing; see section 3). The numbers and arrows show the median seeing. The vertical dashed lines indicate the seeing threshold ( $1''/3$ ) below which visits are used in the processing. Note that the seeing shown is as measured and is not corrected for airmass. (Color online)

### 2.3 Previous internal releases

We have made several internal data releases so far. As the data from these internal releases are used in our science papers, we briefly summarize them in table 3. We started

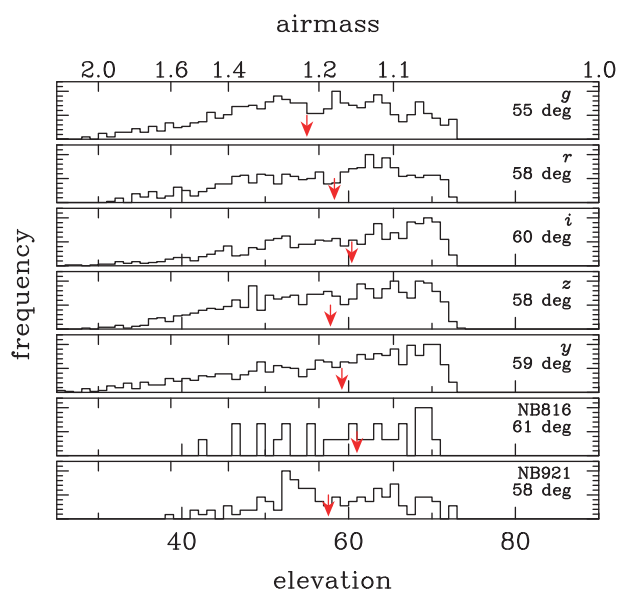

**Fig. 4.** Distribution of elevation at which visits are taken for each filter. The top ticks show the corresponding airmass. The numbers and arrows show the median elevation in each band. (Color online)

with a test release (S14A0) including data from the first observing run, followed by larger data releases for science twice a year. Major updates in the processing pipeline were made in each release and the data quality steadily improved. Five internal data releases have been made to date, and the S15B release forms the basis of this public release. We present the exact definition of the data included in this public release in subsection 3.9.

## 3 Data processing

### 3.1 Terminology

In order to describe our data, we introduce a series of HSC/LSST-specific terms. They are also defined in Bosch et al. (2018) in detail. These terms are defined based on the terminology in the Subaru Telescope’s data archive system (Subaru Telescope ARchive System: STARS)<sup>4</sup> as well as data handling needs in our data analysis.

**Visit** is an integer number uniquely assigned to each exposure, i.e., a single shot of an image with HSC. A **visit** comprises 112 CCD images and is always an even number incremented by 2 every exposure. Each individual CCD of a **visit** is referred to as a **ccd**; this is an integer number between 0 and 111 and is equivalent to the FITS header keyword **DET-ID**. This pair of numbers, **visit** and **ccd**, is used to identify the CCD data of a given visit. In STARS, each raw CCD data is stored as a separate FITS image file, each of which is assigned a unique id called **FRAMEID**. CCD

data can be also identified by **FRAMEID**, and there is a one-to-one mapping between **FRAMEID** and a **visit**, **ccd** pair.

The data are processed in several separate stages—single-visit processing followed by several multi-visit processing stages. The single-visit processing is done for each visit separately. The multi-visit processing which follows is performed on a group of multiple visits, generating combined coadd products as well as source catalogs measured from the coadds. In the latter stage, the data sets are processed separately in equi-area rectangular regions on the sky. The regions, called **tracts**, are predefined as an iso-latitude tessellation, where each **tract** covers approximately  $1.7 \times 1.7$  square degrees of the sky. Neighboring tracts have a small overlap,  $\sim 1'$  around the equatorial fields. A **tract** is further divided into  $9 \times 9$  sub-areas, each of which is 4200 pixels on a side (approximately  $12'$ ) and is called a **patch**. Adjacent patches have an overlap of 100 pixels on their edges. These **tracts** and **patches** are the two major areal units introduced to parallelize the processing.

In the final steps of the coadd analysis, we detect sources and measure their properties on the coadd image. We first measure sources in each band separately, and then combine these measurements to perform consistent photometry across the bands. We refer to the first measurement as the **unforced** measurement and the latter as **forced**.

We will describe each procedure in detail in the next sections, but we use this terminology defined here throughout the paper as well as many of our science papers.

### 3.2 Data screening

Data sets for processing are selected on the basis of the results from the data evaluation by the on-site quality assurance (QA) system (Furusawa et al. 2018), which is located at the Hilo facility of the Subaru Telescope. The onsite QA system records data quality information such as seeing and sky transparency, as well as observers’ notes, in a dedicated database. The first step in the data screening is to select visits taken with an exposure time of 30.0 s or longer. The visit list is further screened to include data with decent quality by applying the following conditions: (1) background count  $\leq 45000$  ADUs (a constraint on sky brightness, but few visits are removed by this cut), (2) seeing FWHM  $\leq 1''.3$ , and (3) sky transparency  $\geq 0.3$ . We further filter the visit list by carefully reviewing the observers’ notes to generate the final visit list for processing. About 90% of the visits pass all the screening. This does not mean that the weather is good 90% of the time, but it simply means that we could obtain good data for 90% of the time we could observe on the sky. Data collected through 2015 November are included in the processing. During the validation phase, we discovered a point spread function (PSF) modeling problem in VVDS and we

<sup>4</sup> (<https://stars.naoj.org/>).



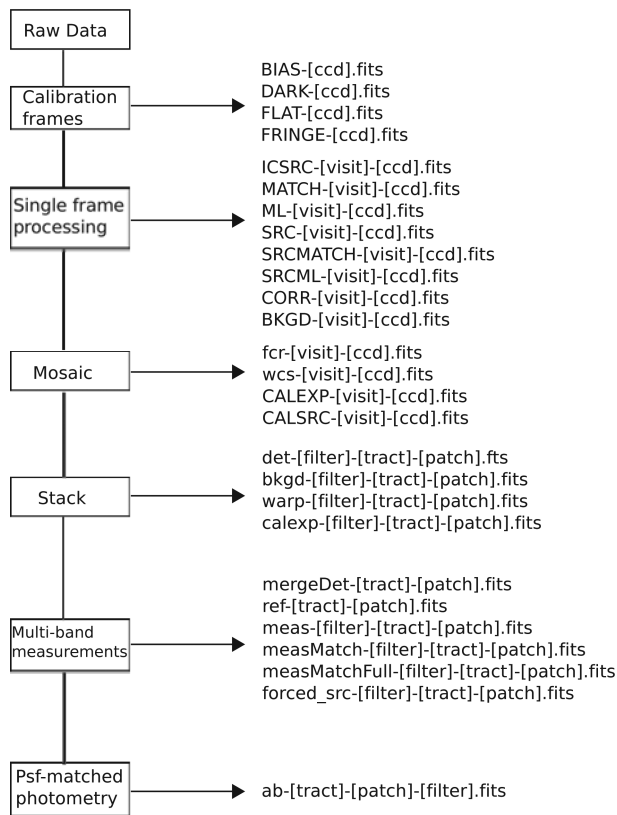

Fig. 5. Schematic view of the flow of the processing and data products generated at each stage.

have further removed a small fraction of visits from that field (subsection 3.7).

### 3.3 Single-visit processing—detrending and calibration

In the following subsections, we briefly describe how we process the data. We refer the reader to the pipeline paper (Bosch et al. 2018) for algorithmic details. Figure 5 summarizes the flow of the processing as well as the data products generated in each processing step.

The single-visit processing is a procedure to correct cosmetics of the CCD data and homogenize and linearize counts, and to determine photometric zero-points and astrometric solution per CCD. Each processed CCD image is stored in a separate file.

The single-visit processing starts with detrending—overscan subtraction, two-dimensional bias and dark subtraction, and flatfielding. We use the dome flat for flatfielding as it is a stable flat source. It does not give uniform illumination across the field of view, but it will be corrected for in the joint calibration process described below. Fringes are subtracted in the  $y$  and  $NB921$  bands because they are evident only in these bands. Variance and mask

images are generated from a science image and are processed as with the science image. Dedicated mask values are used to indicate the known bad pixels, detected cosmic rays, crosstalk, saturated pixels, etc., all defined in the FITS header. After the bias subtraction, the linearity is corrected for using a set of predefined linear coefficients for each CCD based on the laboratory measurements. In addition, the brighter-fatter effect, whereby brighter stars have a broader PSF due to detector physics (Antilogus et al. 2014), is also corrected (see Bosch et al. 2018 for details). We measure the sky in grids of 128 pixels on a side and fit a two-dimensional Chebyshev polynomial to model the sky background, taking into account the inverse variance in each grid. The sky model is then subtracted from the original image.

We characterize the PSF by using a customized version of PSFEX (Bertin 2011). For each CCD, we fit a pixelized image as a function of position to selected stellar candidates, in order to reproduce the PSF at any given position. On average, we select  $\sim 70$  candidate stars per CCD with a typical  $S/N \sim 100\text{--}200$ , which roughly corresponds to 20–22 magnitudes (exact numbers depend on the filter and observing conditions). Based on this PSF information, cosmic rays are detected and interpolated by the surrounding pixels. Sources are detected by applying the maximum likelihood technique, and their pixel coordinates and fluxes are measured on each CCD. Aperture corrections, which are required to account for fluxes outside of the sinc aperture used in the zero-point determination (see below), as a function of coordinates are also estimated in this step. The typical aperture correction is a few per cent.

Photometric zero-points are determined on a CCD-by-CCD basis by comparing sinc fluxes (12 pixel radius aperture; Bickerton & Lupton 2013) of bright point sources and their fluxes from the Pan-STARRS 1 (PS1)  $3\pi$  catalog (see subsection 5.1). We apply color-terms to translate the zero-points from PS1 into the native HSC system (Kawanomoto et al. 2017). Some of our data are taken under non-photometric conditions, but the effects of clouds are largely removed by calibrating against the external catalog. Astrometry is calibrated against PS1 as well, and the WCS (TAN-SIP) is fitted across the entire focal plane (i.e., 104 CCDs) with ninth-order non-linear terms. We do not warp the images in the single-visit processing. The WCS includes the correction for the optical distortion.

### 3.4 Multi-visit processing—mosaic, joint calibration, and coadding

The multi-visit processing stage coadds the detrended CCD images from multiple visits into a deeper stack to achieve a

higher  $S/N$ . The first step, mosaicking, solves for the relative positions and flux scales of each CCD. This is done on a tract-by-tract basis. A matched list of reference sources (bright stars) from each CCD in a given tract is first generated, and we solve for a set of spatially varying terms and per-CCD scaling to minimize the difference in the coordinates and fluxes of overlapping sources on different CCDs/visits by the least-squares method. This procedure is similar to the über-calibration in SDSS (Padmanabhan et al. 2008). This process corrects for the systematic flux error introduced by the dome flats, as well as zero-point and astrometric errors in the individual CCDs. The resultant internal photometry and astrometry show a smaller scatter by  $\sim 10\%$ .

Utilizing the improved photometry and astrometry, the individual CCD images are warped onto patches. For each patch a coadded image is created, weighted by the inverse of the mean variance for each input image (i.e., all the pixels in an input image have the same weight). We do not apply a global sigma-clipping algorithm as that will adversely impact the shape of the PSF on the coadd. Instead, we identify regions in individual visits that are significantly different from other visits. The pixels from these regions are then clipped from the coadd. Refer to sub-subsection 3.3.2 of Bosch et al. (2018) for more details. While the coadd PSF for objects from these regions is not correct, such objects are flagged and can be ignored for scientific analyses. This process will also reduce the occurrence of transient objects such as satellite trails, ghosts, and cosmic rays.

### 3.5 Multi-band measurements

We then move on to detect and measure sources on the coadds. In order to measure photometry consistently across the bands, we follow the following steps. First, we detect sources on the coadds for each band separately using the same algorithm as SDSS (i.e., maximum likelihood detection). In short, we convolve the science image with the PSF and search for above-threshold pixels ( $5\sigma$ ). Our detection is thus optimized for point sources. See subsection 4.7 of Bosch et al. (2018) for further details. The lists of the detected objects in a given patch are merged into a master detection catalog. This catalog contains positions and pixel coverages (footprints) of all the detected sources for detailed measurements.

We then perform unforced measurements of the coordinates, fluxes, and shapes of each of the sources listed in the merged detection catalog. Objects are deblended to child objects when needed, and measurements are also performed on the children. In this step, the centroids and object shapes are allowed to vary from band to band. This is why we

call this “unforced.” As the centroids and shapes are different from band to band, the measurement does not give good colors of objects, but unforced CModel<sup>5</sup> and Kron fluxes are likely a better proxy for total fluxes in each band than the forced measurements described below. From the unforced measurements, we choose one reference band for each object. We refer to Bosch et al. (2018) for the detailed algorithm used to choose the reference filter, but the  $i$  band is the reference band for most objects.

Finally, we perform forced measurements. In this last step, objects’ centroids and shapes from the reference band are applied to all the other bands. Thus, we perform photometry consistently across the bands. However, we apply no smoothing to equalize the PSF across the bands in our processing, and fixed aperture photometry does not deliver consistent colors of objects. Measurements that explicitly incorporate the PSF in each band such as PSF flux and CModel flux should be used for colors. The multi-band catalogs from the forced measurements should be the most useful catalogs for a wide range of scientific applications.

### 3.6 Afterburner

The above procedures are the main processing steps, but we have performed additional processing described in this and the following subsections.

The deblender tends to fail in very crowded areas such as cores of galaxy clusters. The failure results in poor photometry, causing cluster finders to miss clusters or misidentify the brightest cluster galaxies (Oguri et al. 2018). To mitigate this problem, we apply Gaussian smoothing to a set of three target FWHMs,  $0''.6$ ,  $0''.85$ , and  $1''.1$ , to perform PSF-matched aperture photometry for each FWHM (this is only an approximate PSF equalization because the true PSF is not Gaussian). When the native seeing is worse than the target seeing, we do not make an attempt to deconvolve. We instead give a flag to indicate a measurement failure. The photometry is done on both the parent and child images at the positions of parent and all children, but the measurements on the parent are most useful to mitigate the deblender problem. As shown in sub-subsection 5.8.10, the PSF-matched photometry delivers better colors than CModel in crowded fields. This seems to be the case for isolated objects as well, because photometric redshifts using the PSF-matched fluxes are better than those using the CModel fluxes (Tanaka et al. 2018). However, the PSF-matched photometry does not necessarily give better total fluxes.

<sup>5</sup> Composite model photometry. It fits a linear combination of exponential profile and de Vaucouleurs profile convolved with PSF to objects (Lupton et al. 2001; Abazajian et al. 2004; Bosch et al. 2018).

In addition to the PSF-matched photometry, the junk suppression algorithm, which was mistakenly disabled in the main processing as described in sub-subsection 5.8.1, is turned on and objects that should have been eliminated are flagged.

These processes were run as an afterburner, and the photometry and flags are stored in a separate database table termed `afterburner`, which can be joined with other tables by object IDs. Note that the PSF-matched photometry will be a part of the main processing in our future runs and will not be stored in a separate table.

### 3.7 VVDS reprocessing

Some of the visits in VVDS have excellent seeing—better than  $0''.4$ . However, the exquisite seeing unfortunately caused problems in the PSF modeling, possibly because the PSF is undersampled (recall that the pixel scale is  $0''.168$ ). We have not yet fully understood the root cause of the problem (see Mandelbaum et al. 2018 for more discussion), but as a temporary solution we have excluded visits with too good seeing (20 in total) and reprocessed the VVDS field. A significant area (roughly 5 square degrees) in VVDS is affected by this problem in the  $i$  band, but it is also seen in the  $z$  band over a much smaller area (about 20 patches). As the affected  $z$ -band area is not large, we chose to reprocess only the  $i$  band. The affected  $z$ -band photometry should not be used and we provide a database table to identify the problematic patches (see section 6). Note that only the reprocessed data are available in the database. We anticipate that further improvements in the pipeline will allow us to use the currently excluded data in the future.

### 3.8 COSMOS Wide-depth stacks

There is a wealth of deep multi-wavelength data in the COSMOS field (Scoville et al. 2007), and the field can be used for various tests and calibrations. In order to perform photo- $z$  calibrations at the depth of the Wide survey, we have stacked a subsample of the COSMOS data to a depth approximately similar to the Wide layer.<sup>6</sup> The large number of visits taken under various observing conditions allows us to generate Wide-depth stacks for a range of seeing sizes. We have generated best, median, and worst seeing stacks with FWHMs of roughly  $0''.5$ ,  $0''.7$ , and  $1''.0$  in all the bands. Two to four visits are included in the processing, depending on the band. The multi-band processing is then run to generate photometric catalogs. These Wide-depth stacks are stored in separate database tables from the main tables.

<sup>6</sup> The exposure is not exactly the same because the individual exposure times are different between the Wide and UltraDeep layers.

### 3.9 Release data

As our survey is still in progress, our current data are far from uniform in terms of both depth and the number of filters observed (i.e., not all the area is covered in all five filters), especially in the Wide layer. We have chosen to release the full-color full-depth Wide area to the community to ensure data uniformity. We define the full-color full-depth area using `countInputs`, which is the number of visits contributing to a patch, and require the mean `countInputs` in a patch to be larger than  $5/6$  of the nominal number of visits in each of the five filters (4, 4, 6, 6, 6 visits in *grizy*).<sup>7</sup> As mentioned earlier, many of our first science papers are based on the full-color full-depth data and thus this is also important from the point of view of the reproducibility of our science results. For Deep and UltraDeep, the full area has already been observed. The current depths are much shallower than those we expect to reach at the end of the survey, but the data are already very useful for scientific exploration. For this reason, we release all of the Deep and UltraDeep data to the community (exactly the same data as the S15B internal data release).

## 4 Data products

This section describes the data products generated in the processing detailed in the previous section. Understanding our data products requires knowing about algorithmic details in the processing, and we once again refer the reader to Bosch et al. (2018). We first focus on image products and then turn our attention to catalog products, as images and catalogs can be retrieved from our data release site in different ways (i.e., image file access vs. database query). Figure 5 summarizes the data products generated at each processing stage. The figure gives a nearly complete list of the products, but not all of them are important for scientific use (e.g., some are used for data validation), and we focus on the most important ones here. The data release site describes all the products.

### 4.1 Image data

The processed images, both individual CCD images and coadds, are stored in the standard FITS format with three image layers and multiple binary tables. A basic FITS header representing the characteristics of the data and the processing record is placed in the primary header/data unit (HDU). The science image, mask image, and variance image are stored in the next three HDUs. The definition of the

<sup>7</sup> A slightly different definition of the full-color full-depth area may be found in our science papers, but it is driven by scientific needs and its definition is explicitly spelled out in each paper.

mask bits can be found in the header. Photometric zero-points are also given in the header, although they are not fully meaningful without aperture corrections. The binary tables contain information about, e.g., PSF models and aperture corrections, and users normally do not need to read these tables directly—they can be most easily read using the pipeline functions.

Detrended individual CCD images with photometric and astrometric calibrations applied are called CORR images. The photometry and astrometry are updated in the joint calibration step (*mosaic* in figure 5) and stored as CALEXP images, which should be used for analysis on individual CCDs requiring decent accuracy of flux and/or coordinates of objects, such as identifying moving objects, assessing light curves of variables, and so on. These CCD images are then warped to patches (*warp*) and coadded (*calexp*). The latter is often referred to as a patch image. The coadd images have a homogenized photometric zero-point of 27.0 mag ADU<sup>-1</sup>. Objects are detected, and the unforced and forced measurements are both performed on the *calexp* images. *Calexp* has an overlap of 100 pix (~17") on each side with adjacent patches.

## 4.2 Catalog data

A number of catalogs are also generated during the processing. All the catalogs are FITS binary tables, and the column names are in many cases self-explanatory. In addition, the FITS header gives brief explanations of the tabulated quantities. More detailed descriptions may be found in the online documentation at the data release site. Although some of the FITS catalog tables are withheld from this

release, we describe them below for the sake of completeness. We will make them available along with the shape catalog in a future incremental release.

Source catalogs (SRC) have detailed measurements of detected objects in each CCD, and *meas* and *forced\_src* have unforced and forced measurements on the coadds, respectively. The latter two catalogs, as well as closely related catalogs, are loaded into the database, which offers an easy way to retrieve the measurement results. Measurements include extensive flag bits, which indicate the reliability of the measurements. Measurement flags should be applied for scientific use of our data. We summarize some of the most frequently used flags in table 4.

## 4.3 Selecting objects with clean photometry

As noted above, patches and tracts overlap each other, and objects in the overlapping regions are detected and measured multiple times. They are all in the database. In order to eliminate duplicates, users should apply the flags *detect\_is\_patch\_inner* and *detect\_is\_tract\_inner*, which select unique objects. Also, measurements are performed for both parent (i.e., before deblending) and children (i.e., after deblending). In order to select objects after deblending, one needs to impose *deblend\_nchild* = 0. In practice, one can use *detect\_is\_primary*, which does all the above; it selects objects in the inner tract and patch and without any children. Also, one useful parameter for deblending is *blendedness\_abs\_flux*, which shows the ratio of the flux of the child objects to the total flux, indicating how strongly objects are blended (for details, see R. Murata et al. in preparation).

**Table 4.** Some of the most important flags and parameters stored in the database.\*

| Flag / parameter                       | Description                                                                                            |
|----------------------------------------|--------------------------------------------------------------------------------------------------------|
| <i>centroid_sdss_flags</i>             | Object centroiding failed                                                                              |
| <i>flags_pixel_interpolated_center</i> | Any of the central 3 × 3 pixels of an object is interpolated                                           |
| <i>flags_pixel_interpolated_any</i>    | Any of the pixels in an object's footprint is interpolated                                             |
| <i>flags_pixel_saturated_center</i>    | Any of the central 3 × 3 pixels of an object is saturated                                              |
| <i>flags_pixel_saturated_any</i>       | Any of the pixels in an object's footprint is saturated                                                |
| <i>detect_is_patch_inner</i>           | Object is in an inner region of a patch                                                                |
| <i>detect_is_tract_inner</i>           | Object is in an inner region of a tract                                                                |
| <i>detect_is_primary</i>               | Object is a primary object, meaning that it does not have any children and is in inner tract and patch |
| <i>deblend_nchild</i>                  | Number of children; 0 if object is not deblended                                                       |
| <i>blendedness_abs_flux</i>            | Measure of how strongly object is blended; defined as 1 − flux(child)/flux(total)                      |
| <i>flux_psf_flags</i>                  | PSF flux measurement failed                                                                            |
| <i>flux_kron_flags</i>                 | Kron flux measurement failed                                                                           |
| <i>flux_cmodel_flags</i>               | CModel flux measurement failed                                                                         |

\*The flags for fluxes are given for each filter. There are also filter-independent flags such as *detect\_is\_primary*.

In order to have a set of objects with clean photometry, one is advised to apply further flags. The pixel flags in table 4 are among the most important ones. The `saturated` and `interpolated` flags come in two variants: `any`, meaning that at least one pixel in the object footprint is saturated or interpolated over (typically because of a cosmic ray or bad pixel column), and `center`, meaning that the pixel in question lies within the central  $0''.5$  (3 pixels) of the center. The latter can be used in most cases because the interpolation outside of the central region should be reasonable, and if an object is saturated in the outer parts, it should be saturated in the center as well. There are other pixel flags, such as `pixel_bad` and `pixel_cr_center`, but due to improper flag propagation (see subsection 5.8) in the coadds, they are not very effective. Most of the objects that should have these flags set can be identified with the interpolation flag. In addition, many of the measurement algorithms require object centroids in the first place, and it is good practice to ensure good centroids with `centroid_sdss_flags`. Finally, flux measurement flags such as `flux_psf_flags` should also be applied to ensure clean photometry. Note that each photometry technique has its own flags, and the flags are given for each band separately. Flags should be applied to all the filters of interest.

#### 4.4 Value-added catalogs

In addition to the pipeline products described above, value-added products such as photometric redshifts (photo- $z$ 's) are available in separate database tables. We briefly describe them here.

##### 4.4.1 Photometric redshifts

The HSC photo- $z$  working group has computed photo- $z$ 's for this public release. Catalog products such as photo- $z$  point estimates and confidence intervals are available from the database, and full probability distributions are available in the FITS format for download from the data release site. Due to a technical problem during the photo- $z$  production phase, we are unable to release photo- $z$ 's for the Wide area in Data Release 1, but they are included in the first incremental data release that happened in 2017 June. Refer to Tanaka et al. (2018) for details.

##### 4.4.2 Public spectroscopic redshifts

Partly for the purpose of the photo- $z$  calibrations, we have collected public spectroscopic redshifts from the literature: zCOSMOS DR3 (Lilly et al. 2009), UDSz (Bradshaw et al. 2013; McLure et al. 2013), 3D-HST (Skelton et al. 2014; Momcheva et al. 2016), FMOS-COSMOS (Silverman et al. 2015), VVDS (Le Fèvre et al. 2013), VIPERS PDR1 (Garilli et al. 2014), SDSS DR12

(Alam et al. 2015), GAMA DR2 (Liske et al. 2015), WiggleZ DR1 (Drinkwater et al. 2010), DEEP2 DR4 (Davis et al. 2003; Newman et al. 2013), and PRIMUS DR1 (Coil et al. 2011; Cool et al. 2013). These redshifts, as well as confidence flags, are stored in a database table and matched with the HSC objects by position. Each survey has its own flagging scheme to indicate the redshift confidence, and we have a homogenized flag for each object for easy selection of objects with reliable redshifts. The online documentation gives the details.

*It is important to emphasize that users should acknowledge the original data source(s) when using this table.* It is straightforward to identify which survey observed a given object; we have a set of database flags to indicate that.

## 5 Data quality

We now discuss the quality of our data. We have performed a number of validation tests, and we present here some of the key results to illustrate our data quality. For the sake of simplicity, we show only a few plots for each test, but more plots can be found online. First of all, we demonstrate the quality of our data with the UltraDeep COSMOS image in figure 6. As shown later in the section, this image reaches  $\sim 26$ – $27.5$  mag with seeing FWHM between  $0''.6$  and  $0''.9$  in the five broad bands. The image shows a tiny fraction of the whole COSMOS field, and we detect as many as  $\sim 1.7 \times 10^6$  objects over the entire COSMOS area, allowing us to peer deep into the distant universe. This is a powerful dataset when combined with the wealth of ancillary data available in this field. We note that deeper COSMOS data with combined HSC-SSP and University of Hawaii data are made available in our first incremental release (see Tanaka et al. 2017 and section 7).

### 5.1 Reference catalog

The HSC astrometry and photometry are calibrated relative to the PS1  $3\pi$  catalog (Magnier et al. 2013). We chose this catalog because it covers all of our survey regions to a reasonable depth (allowing for a few magnitudes of overlap, from saturation of HSC to the detection limit of PS1) with a similar set of bandpasses (*grizy*; in particular, the availability of the  $y$  band greatly simplifies the photometric calibration; Tonry et al. 2012). This data release is calibrated against PS1 Processing Version 2 (PV2) data, which were made available to the PS1 Science Consortium members in 2014 December. Internal comparison (Schlafly et al. 2012) and comparison with the Sloan Digital Sky Survey (Finkbeiner et al. 2016) has shown that the PS1 photometric calibration is accurate to approximately 1%



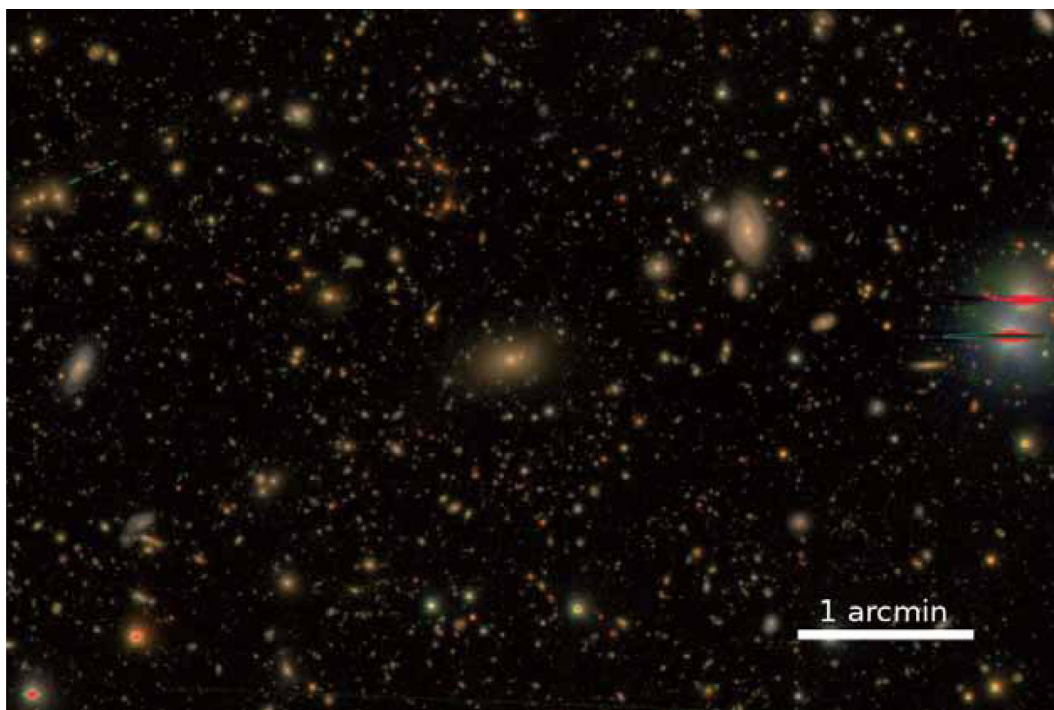

**Fig. 6.** Close-up of the COSMOS UltraDeep area in *riz* using the color scheme of Lupton et al. (2004) centered at RA =  $10^{\text{h}}01^{\text{m}}48^{\text{s}}0$  and Dec =  $+02^{\circ}03'04''$ . This is a  $6' \times 4'$  area, which is roughly 0.3% of the total area of COSMOS. North is up and east is to the left. The image reaches  $i \sim 27.5$  at  $5\sigma$  for point sources. (Color online)

in all bands. The PS1 PV2 astrometry is itself referenced to 2MASS, and the failure to correct for proper motions has left zonal errors (Tholen et al. 2013) up to 100 mas; our HSC calibration will inherit this. Note that the recent public release of PS1 data (Chambers et al. 2016) is from Processing Version 3 (PV3), which has had different astrometric (Berghea et al. 2016) and photometric calibrations applied, and has generally superior quality; we plan to adopt PV3 for future data releases.

In the following subsections, we make several internal and external comparisons. We use stars brighter than 20 mag when comparing against external catalogs, and those brighter than 21.5 mag for internal comparisons.

## 5.2 Astrometry

Astrometric calibration is performed against PS1 PV2 (subsection 5.1) in two stages. First, we derive an approximate astrometric solution for each individual CCD (subsection 3.3). This allows us to match sources between visits, which we use to derive a consistent astrometric solution for multiple overlapping exposures (subsection 3.4). This solution is typically accurate to  $<20$  mas; this is our internal accuracy.

Table 5 presents detailed measurements of our astrometric performance by survey region and filter. HSC stellar

positions measured on the coadds have RMS residuals (in RA and Dec separately) against PS1 of  $\sim 40$  mas and against SDSS DR9 (Ahn et al. 2012) of  $\sim 90$  mas. Figure 7 shows an example field. The RA (and Dec; not shown) offset against PS1 (first panel) does not show any systematic trends, but the residuals against SDSS show small-scale ( $\sim 1^\circ$ ) systematic trends (figure 7, second panel). Similar systematic trends are visible when comparing the PS1 PV2 catalog with SDSS. It is not clear which catalog has the problem, but it is beyond the scope of this paper to further investigate it.

We can test the astrometry for compact and extended sources separately. CModel photometry asymptotically approaches PSF photometry for compact sources, and they have very small magnitude differences. The parameter `classification_extendedness` is based on this difference and is a simple but useful star/galaxy classifier. The classification is done in each band separately, but the *i* band is generally the best band for its superb seeing. When we divide our sources into stars and galaxies using this parameter and compare their positions with the PS1 catalog, we find a differential offset between the stars and galaxies. This offset varies in position angle on the sky from field to field, with an amplitude  $\sim 30$  mas. In the example field shown in figure 7 (third panel), the offset between stars and galaxies is relatively small (20 mas), but varies as a function of position. We currently do not understand the origin of

**Table 5.** Measurements of the quality of astrometric measurements on HSC coadds by survey region and filter.\*

| Region     | Filter   | RA vs. PS1<br>(mas) | Dec vs. PS1<br>(mas) | RA vs. SDSS<br>(mas) | Dec vs. SDSS<br>(mas) | Star–galaxy offset<br>(mas) |
|------------|----------|---------------------|----------------------|----------------------|-----------------------|-----------------------------|
| AEGIS      | <i>g</i> | 32                  | 35                   | 105                  | 100                   | 22                          |
|            | <i>r</i> | 34                  | 35                   | 118                  | 102                   | 21                          |
|            | <i>i</i> | 35                  | 36                   | 122                  | 113                   | 15                          |
|            | <i>z</i> | 37                  | 38                   | 125                  | 113                   | 22                          |
|            | <i>y</i> | 40                  | 38                   | 125                  | 113                   | 25                          |
| W-XMMLSS   | <i>g</i> | 38                  | 34                   | 93                   | 88                    | 21                          |
|            | <i>r</i> | 36                  | 32                   | 96                   | 89                    | 27                          |
|            | <i>i</i> | 36                  | 32                   | 96                   | 89                    | 18                          |
|            | <i>z</i> | 37                  | 33                   | 96                   | 89                    | 26                          |
|            | <i>y</i> | 40                  | 35                   | 98                   | 90                    | 28                          |
| W-GAMA09H  | <i>g</i> | 24                  | 24                   | 73                   | 74                    | 7                           |
|            | <i>r</i> | 23                  | 24                   | 79                   | 77                    | 5                           |
|            | <i>i</i> | 24                  | 24                   | 82                   | 80                    | 4                           |
|            | <i>z</i> | 27                  | 27                   | 84                   | 81                    | 2                           |
|            | <i>y</i> | 26                  | 26                   | 84                   | 82                    | 11                          |
| W-WIDE12H  | <i>g</i> | 34                  | 31                   | 101                  | 88                    | 19                          |
|            | <i>r</i> | 34                  | 29                   | 110                  | 88                    | 19                          |
|            | <i>i</i> | 37                  | 31                   | 114                  | 92                    | 20                          |
|            | <i>z</i> | 40                  | 34                   | 118                  | 96                    | 29                          |
|            | <i>y</i> | 41                  | 35                   | 118                  | 96                    | 23                          |
| W-GAMA15H  | <i>g</i> | 32                  | 30                   | 110                  | 100                   | 14                          |
|            | <i>r</i> | 31                  | 28                   | 116                  | 104                   | 11                          |
|            | <i>i</i> | 30                  | 27                   | 118                  | 105                   | 14                          |
|            | <i>z</i> | 36                  | 32                   | 123                  | 109                   | 21                          |
|            | <i>y</i> | 33                  | 30                   | 121                  | 108                   | 22                          |
| W-HECTOMAP | <i>g</i> | 25                  | 30                   | 83                   | 98                    | 15                          |
|            | <i>r</i> | 23                  | 30                   | 85                   | 102                   | 8                           |
|            | <i>i</i> | 25                  | 31                   | 88                   | 104                   | 9                           |
|            | <i>z</i> | 27                  | 33                   | 91                   | 109                   | 20                          |
|            | <i>y</i> | 27                  | 34                   | 90                   | 108                   | 15                          |
| W-VVDS     | <i>g</i> | 30                  | 27                   | 78                   | 77                    | 9                           |
|            | <i>r</i> | 29                  | 26                   | 80                   | 77                    | 10                          |
|            | <i>i</i> | 31                  | 27                   | 84                   | 78                    | 7                           |
|            | <i>z</i> | 33                  | 30                   | 85                   | 79                    | 10                          |
|            | <i>y</i> | 34                  | 29                   | 85                   | 79                    | 17                          |
| D-XMMLSS   | <i>g</i> | 35                  | 34                   | 86                   | 83                    | 11                          |
|            | <i>r</i> | 36                  | 34                   | 90                   | 84                    | 24                          |
|            | <i>i</i> | 31                  | 29                   | 89                   | 82                    | 16                          |
|            | <i>z</i> | 36                  | 33                   | 92                   | 86                    | 32                          |
|            | <i>y</i> | 39                  | 36                   | 93                   | 87                    | 33                          |
|            | NB816    | —                   | —                    | —                    | —                     | —                           |
| NB921      | —        | —                   | —                    | —                    | —                     |                             |
| D-COSMOS   | <i>g</i> | 34                  | 33                   | 102                  | 102                   | 16                          |
|            | <i>r</i> | 33                  | 31                   | 113                  | 100                   | 11                          |
|            | <i>i</i> | 33                  | 31                   | 115                  | 103                   | 14                          |
|            | <i>z</i> | 35                  | 34                   | 113                  | 104                   | 15                          |
|            | <i>y</i> | 36                  | 33                   | 116                  | 103                   | 32                          |
|            | NB816    | —                   | —                    | —                    | —                     | —                           |
| NB921      | 35       | 32                  | 117                  | 107                  | 20                    |                             |

**Table 5.** (Continued)

| Region     | Filter       | RA vs. PS1<br>(mas) | Dec vs. PS1<br>(mas) | RA vs. SDSS<br>(mas) | Dec vs. SDSS<br>(mas) | Star–galaxy offset<br>(mas) |
|------------|--------------|---------------------|----------------------|----------------------|-----------------------|-----------------------------|
| D-ELAIS-N1 | <i>g</i>     | 27                  | 34                   | 82                   | 95                    | 6                           |
|            | <i>r</i>     | 26                  | 32                   | 88                   | 101                   | 9                           |
|            | <i>i</i>     | 27                  | 33                   | 89                   | 104                   | 7                           |
|            | <i>z</i>     | 29                  | 35                   | 92                   | 109                   | 15                          |
|            | <i>y</i>     | 30                  | 36                   | 91                   | 105                   | 20                          |
|            | <i>NB816</i> | —                   | —                    | —                    | —                     | —                           |
|            | <i>NB921</i> | 30                  | 37                   | 93                   | 108                   | 11                          |
| D-DEEP2-3  | <i>g</i>     | 34                  | 29                   | 104                  | 101                   | 10                          |
|            | <i>r</i>     | 34                  | 28                   | 108                  | 99                    | 15                          |
|            | <i>i</i>     | 35                  | 28                   | 109                  | 97                    | 11                          |
|            | <i>z</i>     | 36                  | 29                   | 112                  | 99                    | 16                          |
|            | <i>y</i>     | 40                  | 32                   | 112                  | 100                   | 23                          |
|            | <i>NB816</i> | 38                  | 30                   | 118                  | 102                   | 17                          |
|            | <i>NB921</i> | 40                  | 31                   | 118                  | 103                   | 22                          |
| UD-COSMOS  | <i>g</i>     | 33                  | 31                   | 99                   | 101                   | 4                           |
|            | <i>r</i>     | 32                  | 29                   | 111                  | 104                   | 7                           |
|            | <i>i</i>     | 36                  | 31                   | 118                  | 106                   | 12                          |
|            | <i>z</i>     | 39                  | 35                   | 118                  | 111                   | 12                          |
|            | <i>y</i>     | 36                  | 33                   | 116                  | 108                   | 24                          |
|            | <i>NB816</i> | —                   | —                    | —                    | —                     | —                           |
|            | <i>NB921</i> | 37                  | 34                   | 121                  | 113                   | 15                          |
| UD-SXDS    | <i>g</i>     | 42                  | 34                   | 87                   | 79                    | 6                           |
|            | <i>r</i>     | 42                  | 33                   | 90                   | 76                    | 19                          |
|            | <i>i</i>     | 38                  | 31                   | 92                   | 80                    | 14                          |
|            | <i>z</i>     | 50                  | 36                   | 101                  | 83                    | 21                          |
|            | <i>y</i>     | 43                  | 35                   | 95                   | 81                    | 25                          |
|            | <i>NB816</i> | 41                  | 34                   | 95                   | 80                    | 22                          |
|            | <i>NB921</i> | 46                  | 39                   | 99                   | 85                    | 25                          |

\*The first four statistical columns are the RMS of residuals of the stated quantity against the stated reference catalog (PS1: Chambers et al. 2016; SDSS: Ahn et al. 2012) for stars. We use stars brighter than 20 mag for comparisons against SDSS and PS1, otherwise we use stars brighter than 21.5 mag. No corrections for proper motion have been made to the reference catalog positions. The final statistical column is the mean of the residual offset against PS1 between stars (identified as sources with `classification.extendedness = 0`) and galaxies. In calculating statistics, we use all suitable sources in the stated region observed in the stated filter, clip at  $3\sigma$  (where  $\sigma$  is estimated from the interquartile range assuming a Gaussian distribution), and then calculate the mean or RMS as appropriate.

this effect, but it is not sufficiently large to prevent most scientific uses of our survey data. It may be another effect of ignoring proper motions in our reference catalog.

## 5.3 Photometry

### 5.3.1 Internal and external comparisons

Like the astrometric calibration, the photometric calibration is performed against PS1 PV2 (subsection 5.1) in two stages. Individual CCDs are first calibrated with a single zero-point against the reference catalog; this zero-point is used for the processing of individual CCDs. Then, in the mosaic stage, we use the multiple observations of sources in dithered exposures to fit a polynomial correction over the focal plane, while accounting for individual CCD offsets.

This corrects for imperfections in the dome flats (e.g., imperfect illumination, scattered light, and optical scale changes), resulting in point sources having consistent corrected magnitudes in the dithered exposures. This correction typically has an RMS of  $\sim 10$  mmag.

Table 6 summarizes our photometric performance. When we compare to the external data, we apply color terms for fair comparisons. HSC PSF fluxes for stars measured on the coadds have RMS residuals against PS1 of  $\sim 20$  mmag and against SDSS DR9 (with fluxes corrected using PS1 photometry; Finkbeiner et al. 2016) of  $\sim 25$  mmag (in *gri*) at bright magnitudes. The scatter is larger in the *z* and *y* bands for SDSS, but this is because we extrapolate the SDSS photometry to the HSC *z* and *y* bands. Since these catalogs individually are believed to be accurate to  $\sim 10$  mmag,

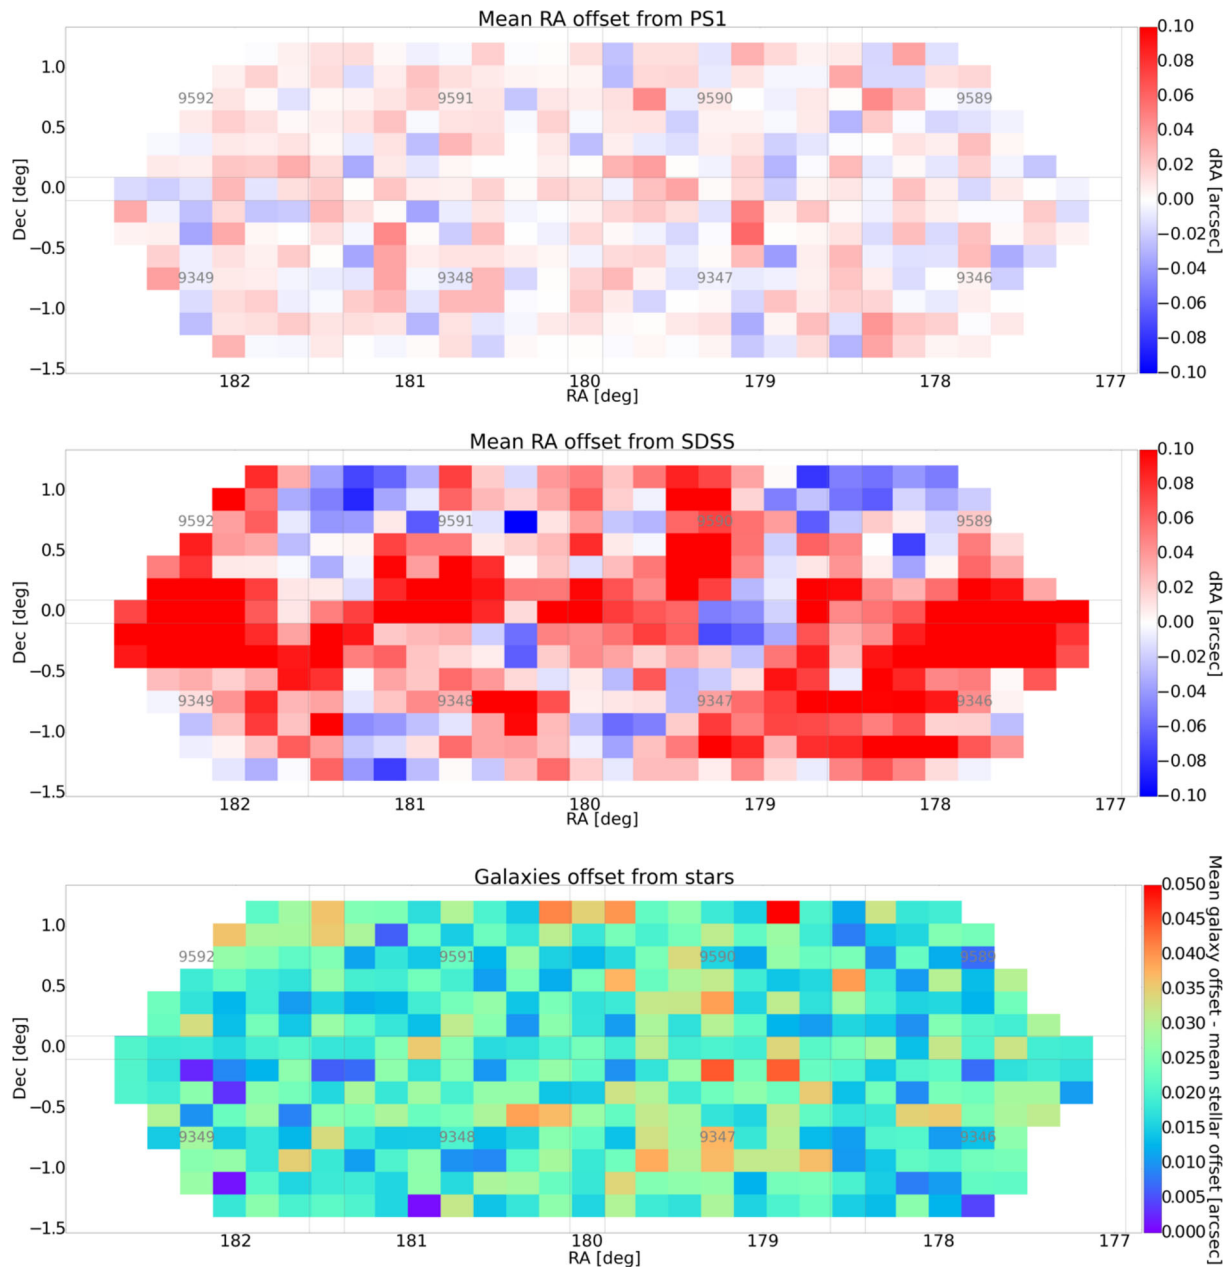

**Fig. 7.** Astrometric quality measures plotted for an example survey component, the WIDE12H region in the  $i$  band. The first and second plots show the mean RA offset per patch against the PS1 and SDSS-DR9 reference catalogs. The third plot shows the astrometric offset between stars and galaxies. Each rectangle corresponds to a patch. The tract IDs and tract borders are shown in gray. (Color online)

assuming that the errors between our catalogs are uncorrelated, this suggests our coadd photometry is accurate to  $\sim 17$  mmag. This value slightly exceeds our goal of 1% photometry, but the scatter is also at least partly due to the spatial variation of the filter transmission; the  $r$ - and  $i$ -band transmission curves change slightly as a function of radius (for details, see Kawanomoto et al. 2017). These filters have been replaced with new ones with much smaller spatial variation, and have been used in our observations since 2016 (but not used in this release). With an updated

PS1 reference catalog, more careful calibration, as well as new  $r$ - and  $i$ -band filters, we expect that we will be able to surpass our goal in future reductions.

One way of checking the internal precision and consistency of our catalog is through comparing measurements made with different flux measurement algorithms. The principal flux measurement algorithms we use are PSF, Kron aperture (Kron 1980), and CModel. Each of these measurements is aperture corrected, and hence different flux measurements should measure the same

**Table 6.** Measurements of photometric quality by survey region and filter.\*

| Region     | Filter   | PSF vs. PS1<br>(mmag) | PSF vs. SDSS<br>(mmag) | PSF-Kron<br>(mmag) | PSF-CModel<br>(mmag) |
|------------|----------|-----------------------|------------------------|--------------------|----------------------|
| AEGIS      | <i>g</i> | 27.3                  | 22.0                   | 10.2               | 3.6                  |
|            | <i>r</i> | 20.1                  | 25.0                   | 8.6                | 2.5                  |
|            | <i>i</i> | 21.6                  | 34.5                   | 9.6                | 3.2                  |
|            | <i>z</i> | 15.5                  | 50.8                   | 9.4                | 2.3                  |
|            | <i>y</i> | 31.7                  | 67.4                   | 13.6               | 3.2                  |
| W-XMMLSS   | <i>g</i> | 24.1                  | 24.3                   | 10.4               | 3.4                  |
|            | <i>r</i> | 21.4                  | 27.3                   | 14.2               | 3.0                  |
|            | <i>i</i> | 17.7                  | 31.0                   | 9.3                | 2.7                  |
|            | <i>z</i> | 16.2                  | 55.5                   | 11.9               | 2.5                  |
|            | <i>y</i> | 31.7                  | 69.8                   | 16.1               | 3.0                  |
| W-GAMA09H  | <i>g</i> | 19.9                  | 16.7                   | 8.2                | 2.2                  |
|            | <i>r</i> | 17.4                  | 21.0                   | 9.3                | 2.0                  |
|            | <i>i</i> | 21.6                  | 28.5                   | 10.4               | 2.2                  |
|            | <i>z</i> | 16.6                  | 55.7                   | 10.0               | 2.1                  |
|            | <i>y</i> | 30.5                  | 71.3                   | 12.3               | 2.3                  |
| W-WIDE12H  | <i>g</i> | 21.3                  | 19.7                   | 9.3                | 2.9                  |
|            | <i>r</i> | 19.7                  | 24.1                   | 7.7                | 2.9                  |
|            | <i>i</i> | 25.0                  | 28.9                   | 8.3                | 2.5                  |
|            | <i>z</i> | 14.8                  | 50.1                   | 8.2                | 2.3                  |
|            | <i>y</i> | 29.7                  | 69.6                   | 13.6               | 3.0                  |
| W-GAMA15H  | <i>g</i> | 19.4                  | 19.3                   | 8.9                | 2.8                  |
|            | <i>r</i> | 18.5                  | 24.1                   | 9.7                | 2.5                  |
|            | <i>i</i> | 17.2                  | 31.4                   | 7.5                | 2.4                  |
|            | <i>z</i> | 16.1                  | 59.9                   | 9.5                | 2.2                  |
|            | <i>y</i> | 29.1                  | 79.8                   | 13.5               | 2.7                  |
| W-HECTOMAP | <i>g</i> | 18.8                  | 18.3                   | 10.6               | 2.7                  |
|            | <i>r</i> | 15.7                  | 23.4                   | 7.6                | 2.2                  |
|            | <i>i</i> | 18.3                  | 31.5                   | 8.0                | 2.9                  |
|            | <i>z</i> | 13.3                  | 52.7                   | 11.7               | 2.2                  |
|            | <i>y</i> | 28.2                  | 73.0                   | 14.8               | 3.0                  |
| W-VVDS     | <i>g</i> | 21.2                  | 18.4                   | 12.1               | 2.8                  |
|            | <i>r</i> | 16.7                  | 22.7                   | 10.7               | 2.6                  |
|            | <i>i</i> | 16.3                  | 27.3                   | 8.5                | 2.5                  |
|            | <i>z</i> | 19.1                  | 57.4                   | 16.2               | 2.6                  |
|            | <i>y</i> | 35.2                  | 71.1                   | 19.2               | 2.8                  |
| D-XMMLSS   | <i>g</i> | 26.5                  | 29.4                   | 12.3               | 3.6                  |
|            | <i>r</i> | 28.5                  | 33.6                   | 14.9               | 4.0                  |
|            | <i>i</i> | 19.2                  | 36.4                   | 12.3               | 2.6                  |
|            | <i>z</i> | 14.9                  | 55.8                   | 14.3               | 2.4                  |
|            | <i>y</i> | 34.1                  | 78.6                   | 18.1               | 2.7                  |
|            | NB816    | —                     | —                      | —                  | —                    |
|            | NB921    | —                     | —                      | —                  | —                    |
| D-COSMOS   | <i>g</i> | 20.3                  | 24.1                   | 11.8               | 3.0                  |
|            | <i>r</i> | 21.0                  | 28.4                   | 8.9                | 3.1                  |
|            | <i>i</i> | 28.1                  | 41.0                   | 19.0               | 3.0                  |
|            | <i>z</i> | 19.4                  | 69.4                   | 9.6                | 2.3                  |
|            | <i>y</i> | 35.2                  | 79.7                   | 14.0               | 3.0                  |
|            | NB816    | —                     | —                      | —                  | —                    |
|            | NB921    | 23.9                  | 61.8                   | 9.5                | 2.2                  |



**Table 6.** (Continued)

| Region     | Filter       | PSF vs. PS1<br>(mmag) | PSF vs. SDSS<br>(mmag) | PSF-Kron<br>(mmag) | PSF-CModel<br>(mmag) |
|------------|--------------|-----------------------|------------------------|--------------------|----------------------|
| D-ELAIS-N1 | <i>g</i>     | 24.2                  | 35.6                   | 15.5               | 3.6                  |
|            | <i>r</i>     | 16.3                  | 29.0                   | 9.6                | 2.4                  |
|            | <i>i</i>     | 19.2                  | 37.5                   | 9.0                | 2.7                  |
|            | <i>z</i>     | 15.9                  | 59.2                   | 13.1               | 2.0                  |
|            | <i>y</i>     | 33.8                  | 83.3                   | 12.4               | 3.2                  |
|            | <i>NB816</i> | —                     | —                      | —                  | —                    |
|            | <i>NB921</i> | 23.0                  | 62.2                   | 10.2               | 2.6                  |
| D-DEEP2-3  | <i>g</i>     | 21.7                  | 21.4                   | 11.9               | 2.8                  |
|            | <i>r</i>     | 19.1                  | 24.9                   | 9.3                | 2.7                  |
|            | <i>i</i>     | 21.4                  | 31.2                   | 12.3               | 2.8                  |
|            | <i>z</i>     | 18.1                  | 54.8                   | 12.7               | 2.0                  |
|            | <i>y</i>     | 34.3                  | 75.7                   | 10.7               | 3.3                  |
|            | <i>NB816</i> | 24.3                  | 35.2                   | 11.2               | 3.4                  |
|            | <i>NB921</i> | 23.9                  | 56.2                   | 11.5               | 3.1                  |
| UD-COSMOS  | <i>g</i>     | 19.6                  | 24.7                   | 11.5               | 2.9                  |
|            | <i>r</i>     | 22.8                  | 36.1                   | 10.9               | 2.9                  |
|            | <i>i</i>     | 25.7                  | 40.3                   | 11.6               | 2.4                  |
|            | <i>z</i>     | 20.5                  | 75.7                   | 13.4               | 2.4                  |
|            | <i>y</i>     | 34.5                  | 85.7                   | 15.1               | 2.1                  |
|            | <i>NB816</i> | —                     | —                      | —                  | —                    |
|            | <i>NB921</i> | 23.4                  | 67.7                   | 10.3               | 1.9                  |
| UD-SXDS    | <i>g</i>     | 28.9                  | 33.4                   | 11.2               | 3.5                  |
|            | <i>r</i>     | 27.4                  | 34.2                   | 17.0               | 3.0                  |
|            | <i>i</i>     | 21.4                  | 41.7                   | 9.5                | 2.4                  |
|            | <i>z</i>     | 26.8                  | 86.5                   | 24.6               | 2.8                  |
|            | <i>y</i>     | 39.9                  | 95.0                   | 12.7               | 2.6                  |
|            | <i>NB816</i> | 26.2                  | 47.2                   | 29.9               | 58.6                 |
|            | <i>NB921</i> | 25.1                  | 65.1                   | 14.1               | 2.0                  |

\*The first two statistical columns are the RMS of residuals of the calibrated PSF magnitude against the stated reference catalog (PS1: Chambers et al. 2016; SDSS: Ahn et al. 2012) for stars. The last two statistical columns are the RMS of the difference between the two stated magnitudes measured by the pipeline for stars. In all cases, stars are identified as sources with `classification.extendedness = 0`. We use stars brighter than 20 mag for comparisons against SDSS and PS1, otherwise we use stars brighter than 21.5 mag. In calculating statistics, we use all suitable sources in the stated region observed in the stated filter, clip at  $3\sigma$  (where  $\sigma$  is estimated from the interquartile range assuming a Gaussian distribution), and then calculate the mean or RMS as appropriate.

values for compact sources, i.e., stars. The width of the distribution of the magnitude difference of two flux measurements of stars is therefore a measure of the quality of each of those flux measurement algorithms, and therefore is a check on the internal photometric precision (it of course says nothing about calibration). We use stars brighter than 21.5 mag here. Our results are summarized in the last two columns of table 6. The distribution of PSF-CModel is always quite tight (3 mmag), except for UD-SXDS *NB816* which suffers from a few problematic patches. This small scatter reflects the fact that the CModel collapses to a PSF measurement for stars, but PSF-Kron gives us an opportunity to evaluate the quality of the PSF modeling because it is being compared to an aperture measurement. Our PSF-Kron

widths are  $\sim 10$  mmag, which indicates that the systematic errors in the PSF photometry are of about that order.

See figure 8 for the statistics in an example field, the GAMA15H region in the *i* band. Our photometry is fairly uniform across the field compared to PS1, with a scatter of 17 mmag. However, there is a zonal offset over a degree scale compared to SDSS. We observe a similar feature in some of the other fields. The internal consistency between the PSF and Kron photometry is better than 10 mmag. Overall, this field is calibrated well and this is the typical photometric quality of our survey. The only exception is the VVDS field, in which a small number of patches suffer from the PSF modeling problem mentioned earlier.

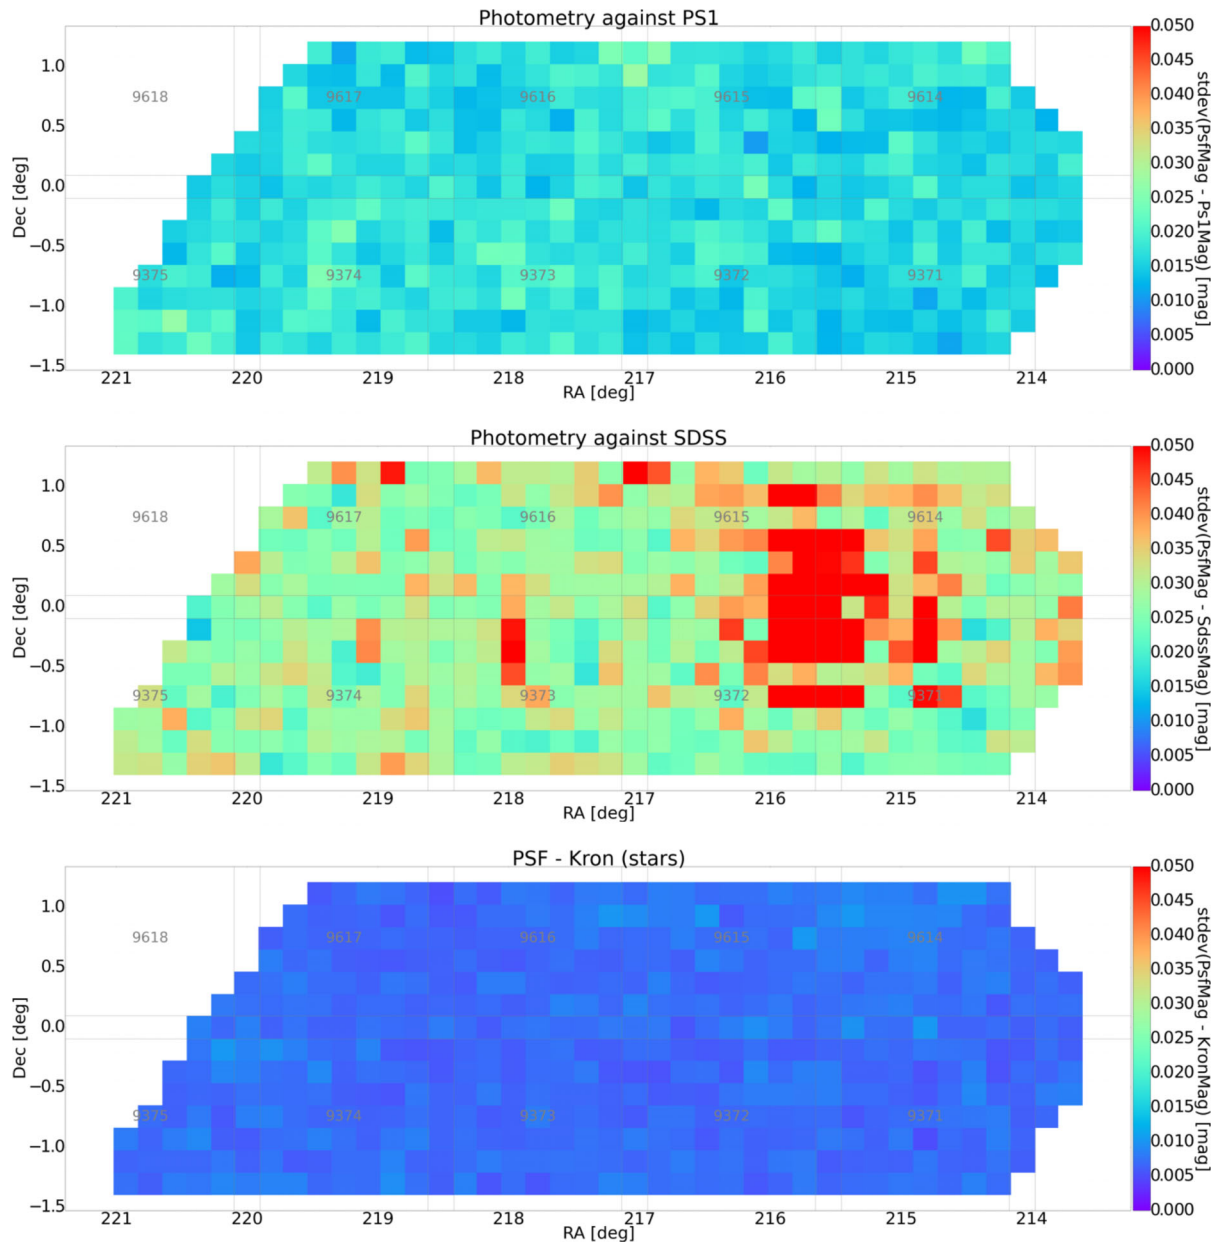

**Fig. 8.** Photometric quality measures plotted for an example survey component, the GAMA15H region in the  $i$  band. The first and second plots show the width of the distribution of the difference in stellar PSF magnitudes from that in the PS1 and SDSS-DR9 reference catalogs done separately on each patch. The third plot shows the width of the distribution of the difference between the PSF and Kron magnitudes. Each rectangle represents a patch. (Color online)

We performed further tests using SynPipe, an HSC synthetic galaxy pipeline (Huang et al. 2018). This is a Python-based module that interfaces with hscPipe and which can inject realistic synthetic stars and galaxies at desired locations in CCD images. We use SynPipe to examine the photometric performance of hscPipe. Details are given in Huang et al. (2018), but in brief, we find that the typical uncertainties of HSC forced PSF photometry for stars range from around 0.01 mag at  $i \sim 18.0$  mag to 0.06 mag at  $i \sim 25.5$  mag in the Wide layer. The 1%

error at the bright end is likely a systematic error in our measurement, in agreement with our earlier tests. For synthetic single-Sérsic model galaxies, the typical uncertainties of HSC forced cModel photometry range from 0.15 mag at  $i \sim 20.0$  mag to 0.20 mag at  $i \sim 25.2$  mag. We will further discuss this large error at bright magnitudes in subsection 5.8. Over the range of colors and magnitudes that we have tested, we find that both forced PSF and cModel photometry provide unbiased estimates of galaxy color.

One of the nice features of ingesting artificial sources is that we can evaluate the effects of blending. We find that the degree of galaxy blending (quantified by `blendedness_abs_flux`, or  $b$  for short) has an important impact on photometry estimates. For stars with  $b > 0.1$ , the forced PSF photometry on average overestimates the magnitudes of stars by 0.1–0.2 mag. For galaxies, high-blendedness typically adds an additional 0.05 mag uncertainty in both magnitude and color estimates. Further discussions can be found in R. Murata et al. (in preparation).

### 5.3.2 Stellar sequence

As another test of photometry, we evaluate the uniformity of the photometric zero-points across the survey area. We estimate an offset between the location of the observed stellar sequence and that of the synthetic Gunn and Stryker (1983) stellar sequence on a color–color diagram as a function of position on the sky. We use only bright stars ( $i_{\text{PSF}} < 22$ ) selected using `classification_extendedness` with a set of flags applied to ensure clean photometry (see table 4). At this magnitude range, the extendedness gives a fairly clean sample of stars, as shown in subsection 5.5, and the photometric uncertainties are small enough for this task. As the offsets are degenerate between the two colors chosen, we assume that the offset is entirely in the vertical direction on the color–color diagrams. Galactic extinction is corrected for, but not all the stars are behind the Galactic dust screen, which may introduce an additional offset and scatter in the stellar color. The offset is evaluated for each patch, and the sky distribution of the stellar sequence offset in one of our fields is shown in the left panel of figure 9. We have removed a global offset, which can be a systematic

error in Gunn and Stryker (1983) and/or in our response functions and is generally at the level of 1%–2%, in order to enhance the spatial inhomogeneity of the photometric zero-point. The figure shows that the zero-point is fairly uniform across the field at the level of 1%. Some of the patches on the field edges have larger errors, but these are noisy regions and their contribution to the overall area is fairly minor.

In the right panel, we estimate the color scatter around the stellar sequence. The color scatter is also fairly small, 2%–3%. Note that the color scatter shown in the figure is due to three filters, but the  $\sqrt{3}$  reduction is not applied here. Also, the intrinsic color scatter of stars may contribute here. Overall, we find that our photometry is accurate to 1%–2% in each band across the survey area. There are a small number of patches with poorer quality due to the PSF problem discussed in subsection 3.7 and subsection 5.8.4, but the photometric quality in the vast majority of the area should be sufficient for science.

### 5.4 Shapes

A chief goal of the HSC survey is to measure galaxy shapes for weak lensing. Our shape catalog is not included in this data release (subsection 2.1), pending careful validation, but will be published separately. Nevertheless, we summarize in table 7 some basic measurements of the data quality as it impacts shape measurement.

Clearly, the seeing over much of the survey area is exquisite, with a mean Gaussian FWHM ranging from 0".5 in the  $i$  band in the HectoMap region to 0".9 in the  $r$  band in GAMA09H and the  $g$  band in HectoMap. The  $i$  band

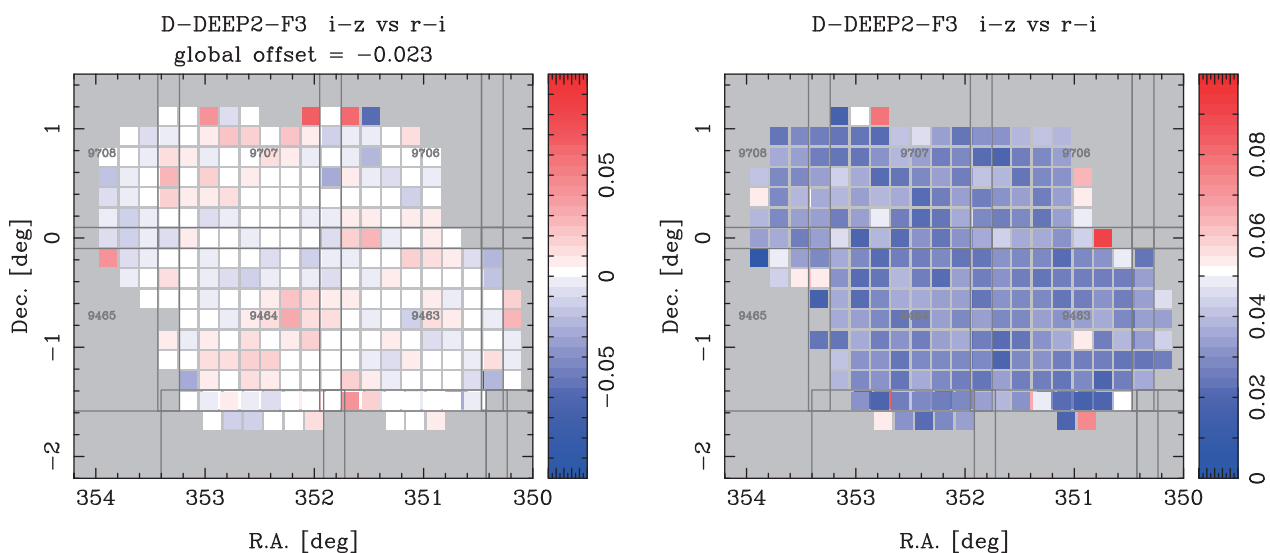

**Fig. 9.** Color offset in the stellar sequence (left) and color scatter (right) in one of the fields on the  $i-z$  vs.  $r-i$  diagram. The median color offset across the field (0.023 mag) is subtracted to highlight the spatial inhomogeneity. The tract IDs and tract borders are shown in gray. (Color online)

**Table 7.** Basic measurements of the data quality impacting shape measurement.\*

| Region     | Filter   | Seeing FWHM<br>(") | Determinant radius difference<br>(") |
|------------|----------|--------------------|--------------------------------------|
| AEGIS      | <i>g</i> | 0.72               | $-0.001 \pm 0.010$                   |
|            | <i>r</i> | 0.71               | $-0.003 \pm 0.008$                   |
|            | <i>i</i> | 0.52               | $-0.004 \pm 0.007$                   |
|            | <i>z</i> | 0.74               | $-0.004 \pm 0.009$                   |
|            | <i>y</i> | 0.65               | $-0.001 \pm 0.012$                   |
| W-XMMLSS   | <i>g</i> | 0.84               | $-0.004 \pm 0.013$                   |
|            | <i>r</i> | 0.84               | $-0.003 \pm 0.014$                   |
|            | <i>i</i> | 0.68               | $-0.003 \pm 0.009$                   |
|            | <i>z</i> | 0.70               | $-0.002 \pm 0.009$                   |
|            | <i>y</i> | 0.77               | $-0.002 \pm 0.014$                   |
| W-GAMA09H  | <i>g</i> | 0.80               | $-0.004 \pm 0.011$                   |
|            | <i>r</i> | 0.87               | $-0.004 \pm 0.011$                   |
|            | <i>i</i> | 0.63               | $-0.003 \pm 0.008$                   |
|            | <i>z</i> | 0.69               | $-0.003 \pm 0.008$                   |
|            | <i>y</i> | 0.69               | $-0.002 \pm 0.010$                   |
| W-WIDE12H  | <i>g</i> | 0.66               | $-0.002 \pm 0.009$                   |
|            | <i>r</i> | 0.55               | $-0.003 \pm 0.006$                   |
|            | <i>i</i> | 0.53               | $-0.003 \pm 0.007$                   |
|            | <i>z</i> | 0.66               | $-0.003 \pm 0.007$                   |
|            | <i>y</i> | 0.63               | $-0.002 \pm 0.011$                   |
| W-GAMA15H  | <i>g</i> | 0.70               | $-0.003 \pm 0.010$                   |
|            | <i>r</i> | 0.63               | $-0.003 \pm 0.008$                   |
|            | <i>i</i> | 0.56               | $-0.002 \pm 0.006$                   |
|            | <i>z</i> | 0.63               | $-0.002 \pm 0.007$                   |
|            | <i>y</i> | 0.67               | $-0.002 \pm 0.011$                   |
| W-HECTOMAP | <i>g</i> | 0.90               | $-0.005 \pm 0.014$                   |
|            | <i>r</i> | 0.73               | $-0.003 \pm 0.007$                   |
|            | <i>i</i> | 0.48               | $-0.003 \pm 0.006$                   |
|            | <i>z</i> | 0.75               | $-0.004 \pm 0.011$                   |
|            | <i>y</i> | 0.59               | $-0.002 \pm 0.011$                   |
| W-VVDS     | <i>g</i> | 0.77               | $-0.003 \pm 0.011$                   |
|            | <i>r</i> | 0.66               | $-0.003 \pm 0.009$                   |
|            | <i>i</i> | 0.53               | $-0.003 \pm 0.007$                   |
|            | <i>z</i> | 0.57               | $-0.003 \pm 0.009$                   |
|            | <i>y</i> | 0.59               | $-0.002 \pm 0.011$                   |
| D-XMMLSS   | <i>g</i> | 0.74               | $-0.003 \pm 0.013$                   |
|            | <i>r</i> | 0.55               | $-0.004 \pm 0.012$                   |
|            | <i>i</i> | 0.85               | $-0.003 \pm 0.014$                   |
|            | <i>z</i> | 1.05               | $-0.004 \pm 0.017$                   |
|            | <i>y</i> | 0.79               | $-0.002 \pm 0.017$                   |
|            | NB816    | —                  | —                                    |
|            | NB921    | —                  | —                                    |
| D-COSMOS   | <i>g</i> | 0.96               | $-0.005 \pm 0.016$                   |
|            | <i>r</i> | 0.59               | $-0.003 \pm 0.008$                   |
|            | <i>i</i> | 0.55               | $-0.001 \pm 0.009$                   |
|            | <i>z</i> | 0.57               | $-0.004 \pm 0.007$                   |
|            | <i>y</i> | 0.65               | $-0.003 \pm 0.012$                   |
|            | NB816    | —                  | —                                    |
|            | NB921    | 0.67               | $-0.002 \pm 0.009$                   |

**Table 7.** (Continued)

| Region     | Filter   | Seeing FWHM<br>(") | Determinant radius difference<br>(") |
|------------|----------|--------------------|--------------------------------------|
| D-ELAIS-N1 | <i>g</i> | 0.61               | $-0.002 \pm 0.011$                   |
|            | <i>r</i> | 0.78               | $-0.003 \pm 0.010$                   |
|            | <i>i</i> | 0.55               | $-0.004 \pm 0.008$                   |
|            | <i>z</i> | 0.80               | $-0.003 \pm 0.013$                   |
|            | <i>y</i> | 0.55               | $-0.002 \pm 0.009$                   |
|            | NB816    | —                  | —                                    |
|            | NB921    | 0.65               | $-0.003 \pm 0.009$                   |
| D-DEEP2-3  | <i>g</i> | 0.93               | $-0.004 \pm 0.015$                   |
|            | <i>r</i> | 0.69               | $-0.004 \pm 0.009$                   |
|            | <i>i</i> | 0.54               | $-0.004 \pm 0.009$                   |
|            | <i>z</i> | 0.68               | $-0.002 \pm 0.010$                   |
|            | <i>y</i> | 0.50               | $-0.002 \pm 0.007$                   |
|            | NB816    | 0.51               | $-0.004 \pm 0.008$                   |
|            | NB921    | 0.57               | $-0.003 \pm 0.008$                   |
| UD-COSMOS  | <i>g</i> | 0.84               | $-0.004 \pm 0.014$                   |
|            | <i>r</i> | 0.58               | $-0.003 \pm 0.009$                   |
|            | <i>i</i> | 0.65               | $-0.003 \pm 0.011$                   |
|            | <i>z</i> | 0.59               | $-0.004 \pm 0.010$                   |
|            | <i>y</i> | 0.74               | $-0.003 \pm 0.015$                   |
|            | NB816    | —                  | —                                    |
|            | NB921    | 0.76               | $-0.003 \pm 0.012$                   |
| UD-SXDS    | <i>g</i> | 0.74               | $-0.004 \pm 0.014$                   |
|            | <i>r</i> | 0.67               | $-0.003 \pm 0.015$                   |
|            | <i>i</i> | 0.68               | $-0.005 \pm 0.010$                   |
|            | <i>z</i> | 0.57               | $-0.009 \pm 0.025$                   |
|            | <i>y</i> | 0.65               | $-0.001 \pm 0.011$                   |
|            | NB816    | 0.64               | $-0.003 \pm 0.047$                   |
|            | NB921    | 1.05               | $-0.006 \pm 0.018$                   |

\*The first statistical column is the seeing FWHM assuming a Gaussian PSF. The second statistical column is the determinant radius difference between the object and the PSF written as mean  $\pm$  RMS. In all cases, stars are identified as sources with `classification.extendedness` = 0. We use stars brighter than 21.5 mag. In calculating statistics, we use all suitable sources in the stated region observed in the stated filter, clip at  $3\sigma$  (where  $\sigma$  is estimated from the interquartile range assuming a Gaussian distribution), and then calculate the mean or RMS as appropriate.

always has the best mean seeing for a given region; this is a result of our observing strategy, which prioritizes the *i* band when the seeing is expected to be good (subsection 2.2).

We compute the determinant radius of object as

$$r_{\text{det}} = (I_{xx} \times I_{yy} - I_{xy}^2)^{1/4}, \quad (1)$$

where  $I_{xx}$ ,  $I_{yy}$ , and  $I_{xy}$  are the second moments of the image. In practice, we measure the second moments with an adaptive window function using GalSim (Rowe et al. 2015). These “adaptive moments” are found by iteratively computing the moments of the best-fitting elliptical Gaussian, using the fitted elliptical Gaussian as a weight function. We use the difference in the determinant radii between the object and the PSF model for quantifying the fidelity of the PSF model.

The mean of the determinant radius difference provides a rough measure of the fidelity of the PSF, while the standard deviation (`stddev`) is a measure of how noisy our measurements are. We find that our PSF models are slightly wider ( $\sim 0.2\%$ ) than the observations. This behavior has been seen by other large surveys (Kuijken et al. 2015; Jarvis et al. 2016) that use PSFEx, and thus is likely a feature of the software. Its impact on the shear estimation is quantified in the shear catalog paper (Mandelbaum et al. 2018), and it turns out to be a subdominant component in our error budget.

See figure 10 for an example Wide layer field, the VVDS region in the *r* band. The seeing in the region can vary significantly (by a factor of 2) from patch to patch, because different areas within the region have been observed under different conditions. Generally, the standard deviation of the difference tracks the seeing because objects have higher



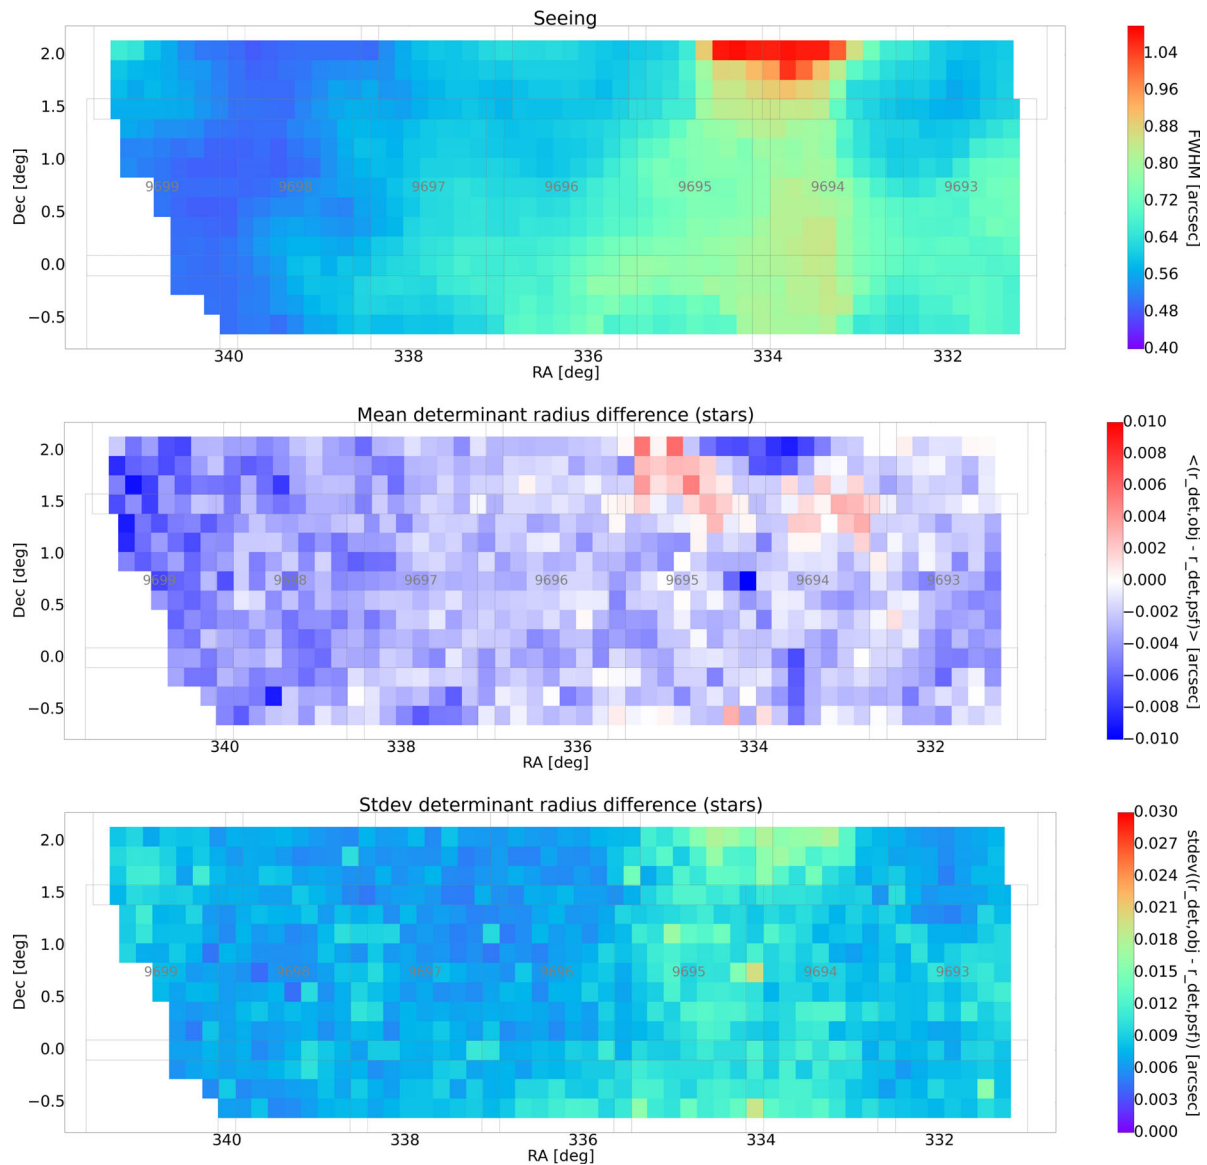

**Fig. 10.** Point spread function model shape quality measures plotted for an example Wide layer survey component, the VVDS region in the  $r$  band. The first plot shows the seeing FWHM in arcsec assuming a Gaussian PSF (i.e.,  $\text{FWHM} = r_{\text{det}} \times 2\sqrt{2\ln 2}$ ). The second and third plots show the difference in the determinant radius between object and PSF, and its standard deviation. Each rectangle represents a patch. (Color online)

$S/N$  under better seeing. It simply means that our shape measurements are noisier when the seeing is worse.

Figure 11 shows an example Deep layer field, the ELAIS-N1 region in the  $r$  band, which consists of four pointings. The mean difference varies over each pointing, while the standard deviation is constant. This may indicate that the PSF is not being fitted well in the center and extremities of each visit, even though the seeing is about  $0''.8$ . The same pattern is seen in the Deep and Ultra-Deep layers and the AEGIS field, but generally not in the Wide layers. This may be because of the large ( $1/3$  of the field of view) dithers used in Wide, which balances out positive and negative errors,

while the Deep, Ultra-Deep, and AEGIS observations are done with small dithers (a few to several arc-minutes). The problem is still being investigated, but we should emphasize that this is a very small effect (0.3% variation in PSF size), and most science should be unaffected by this.

To further evaluate the performance of the PSF modeling, we compare the ellipticity for individual stars, measured by fitting Gaussian moments to their corresponding PSF images. The former are measured on the coadded image, while the PSF modeling is done on the individual visits. The PSF model on the coadds is evaluated by warping and stacking the models from individual visits (Bosch et al.

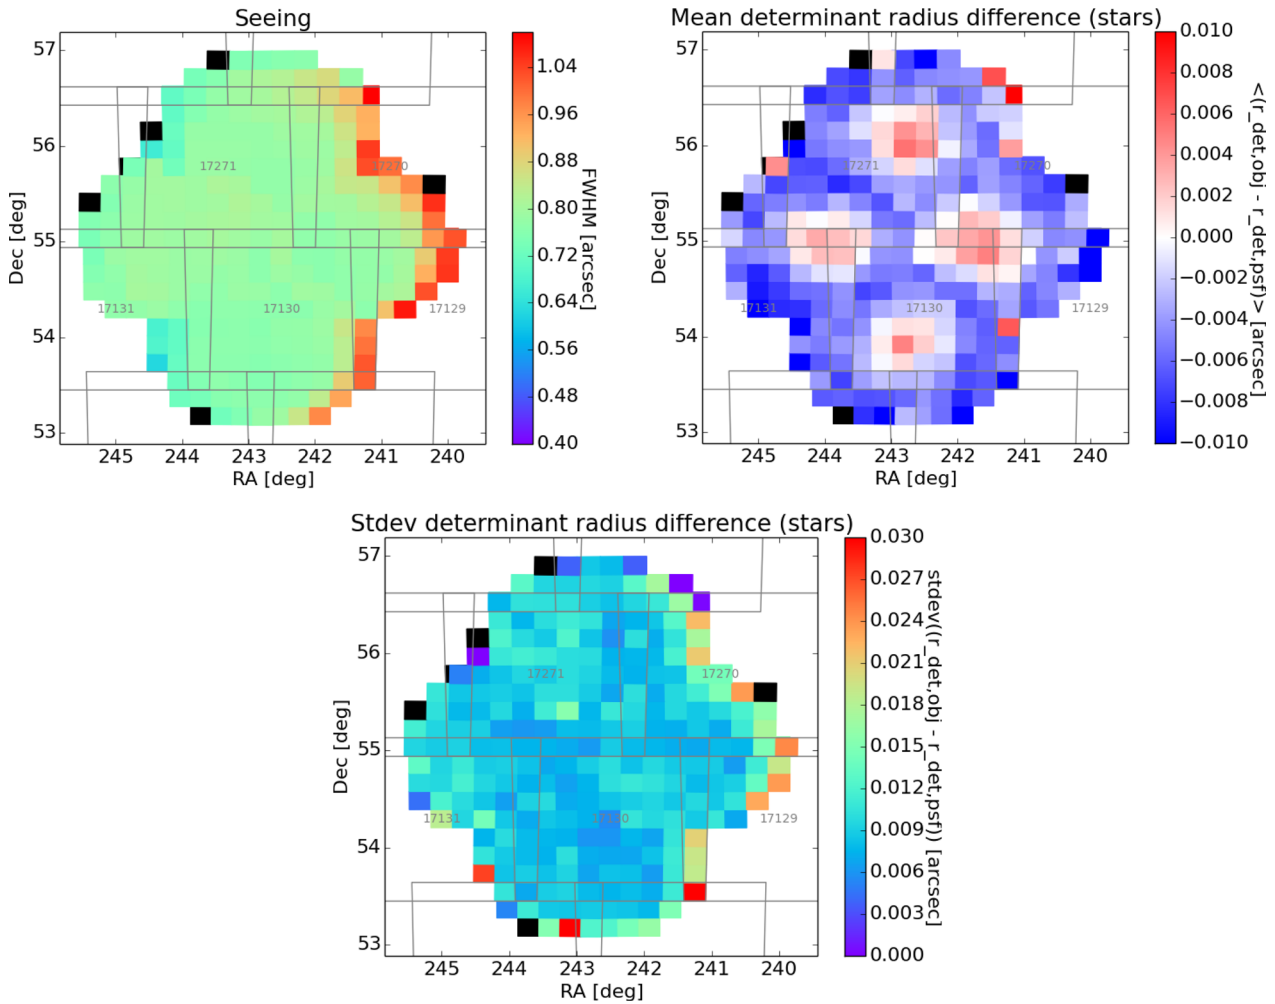

Fig. 11. As figure 10, but for the ELAIS-N1 field. (Color online)

2018). Figure 12 shows the ellipticity residuals for a selection of stars used in the PSF modeling (typically 18–22.5 mag stars) across the whole survey. The plot shows that we model the PSF at the percent level; the scatter in the ellipticity residuals is  $\sim 1\%$ . More in-depth analysis can be found in the shear catalog paper (Mandelbaum et al. 2018).

### 5.5 Star galaxy separation

We have used the `classification_extendedness` parameter to separate stars from galaxies in the previous sections. Here, we test how well the parameter works as a function of magnitude. The parameter is based on the magnitude difference between PSF and CModel, as mentioned above, and is currently a binary classifier with `extendedness` 0 being point-like and 1 being extended in each band. We use the HST/ACS catalog in COSMOS (Leauthaud et al. 2007) as the truth table, which is a reasonable assumption given the higher angular resolution of HST. The star/galaxy classification in the catalog is reliable down to  $i \sim 25$ . As

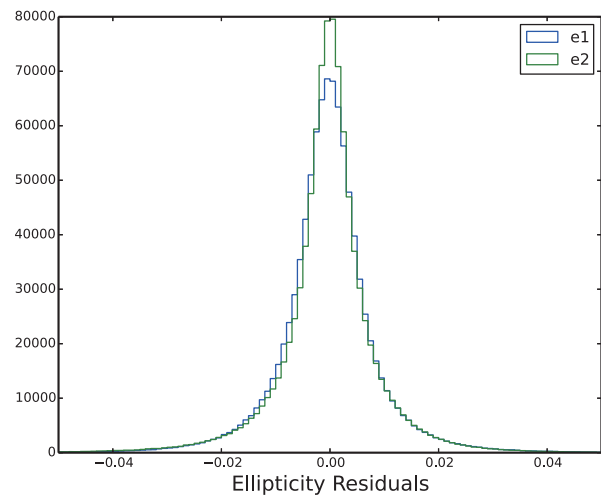

Fig. 12. The distribution of ellipticity residuals for the stars across the whole survey that were selected in the PSF modeling in the  $i$  band. The plot shows the two components of the ellipticity, where  $e1$  corresponds to changes along the coordinate axes and  $e2$  corresponds to elongation at  $45^\circ$  from the axes. (Color online)

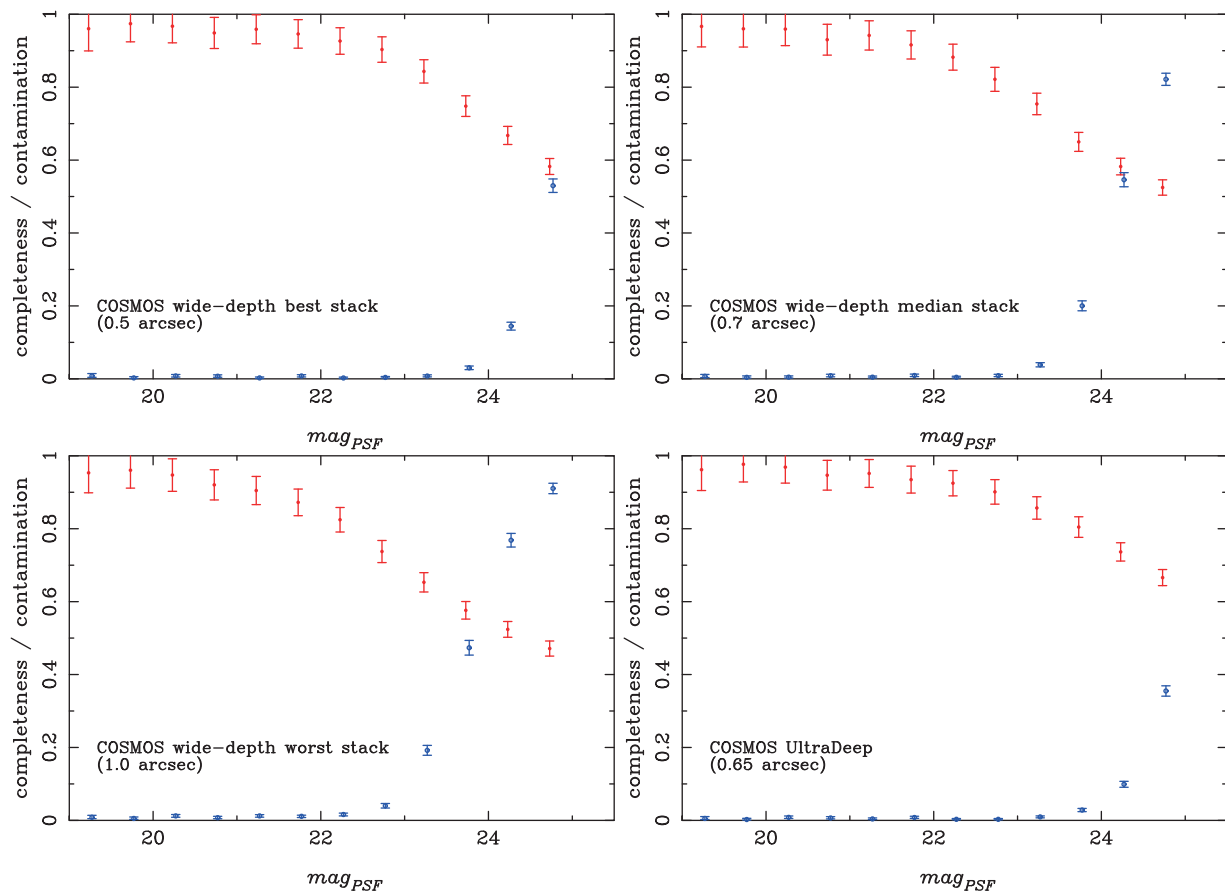

**Fig. 13.** Completeness (red dots) and contamination (blue open circles) as a function of the  $i$ -band PSF magnitude for the COSMOS Wide-depth best (top left), median (top right), and worst (bottom left) seeing stacks. The bottom right figure is for the UltraDeep depth. The error bars are Poisson errors. This is star/galaxy separation compared to HST observations, where star-galaxy separation is taken as truth. (Color online)

the performance of the star-galaxy separation depends on the image depth and seeing, we cross-matched the ACS catalog with the COSMOS UltraDeep as well as with the best, median, and worst seeing Wide-depth stacks.

Figure 13 shows the completeness and contamination of our classifications for the COSMOS Wide-depth stacks with three different seeing sets, and also for the UltraDeep depth. The seeing is shown in each panel. The completeness is defined as the fraction of ACS stars properly classified as stars in HSC. The contamination is the fraction of ACS galaxies among objects classified as stars in HSC. Under the typical seeing conditions of  $0''.7$ , the star-galaxy separation is reasonable down to  $i \sim 24$ , although the completeness is somewhat low (60%). At fainter magnitudes, the classification is rather difficult. The classification accuracy is a strong function of seeing and depth as expected; e.g., the completeness is still 60% at  $i \sim 25$  when the seeing is  $0''.5$ , but the same level of completeness can be achieved only at  $i \sim 23.5$  under  $1''$  seeing. In deeper imaging, the classification is still reasonable even in the faintest magnitude bin, with completeness above 60%.

We plan to include another star/galaxy classifier using the size and color information in a future incremental release. The new classifier gives a continuous probability between 0 and 1, and is known to outperform the extend- edness parameter (Bosch et al. 2018).

## 5.6 Survey depth

We estimate  $5\sigma$  limiting magnitudes in our survey fields. There are a number of ways to estimate the depth, but here we take a simple approach—we estimate magnitudes at which the PSF photometry has  $S/N \sim 5\sigma$ , where the flux uncertainties are as quoted by the pipeline. Because we use the PSF photometry on coadds, we tend to underestimate the flux uncertainty due to covariances between the pixels introduced in the warping, leading us to somewhat optimistic estimates of the depth. Also, systematic uncertainties such as PSF modeling error are not accounted for. Despite these caveats, this is still a useful way to evaluate the depth over the entire survey region. We first apply a

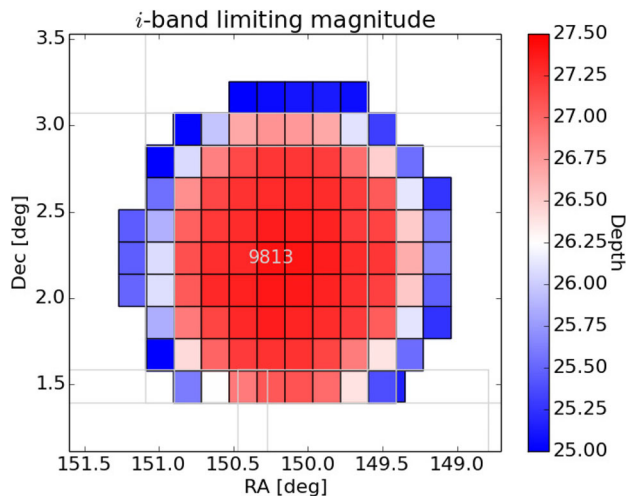

**Fig. 14.** Depth map of the  $i$ -band limiting magnitude for  $5\sigma$  point-source detection in the COSMOS UltraDeep field. Each square represents a patch. (Color online)

set of pixel flags (`flags_pixel_saturated_center`, `flags_pixel_interpolated_center`, `detect_is_primary`) and select objects that have PSF magnitudes  $S/N = 4-6\sigma$  in each patch. We then take their mean magnitude to represent the  $5\sigma$  depth for point sources, assuming that the source distribution is flat within this range. As an example, figure 14 shows the  $i$ -band limiting magnitude map of the UltraDeep COSMOS field. We reach an impressive depth of  $i \sim 27.5$  in the central  $\sim 1.5$  square degrees of the COSMOS field. This is surely one of the deepest images of the COSMOS field (cf. Capak et al. 2007). Once again, this is the depth using only the data gathered in DR1, and we will go deeper in the future. The  $5\sigma$  depths for each filter and for each patch measured in this way over the entire survey fields are available in the database.

## 5.7 Detection completeness

Another approach to characterize the survey depth is to evaluate detection completeness by inserting artificial point sources in the coadds and repeating the detection. One could add objects in individual visits instead of coadds for better estimates (and that is exactly what SynPipe does; Huang et al. 2018), but we work with the coadds in order to save computing time. The detection completeness is dependent on the size and shape of objects, but we focus on point sources for simplicity. We put artificial point sources at random positions in the coadds using the PSF model (`coaddPsf`) at each position. We make a series of magnitude bins and generate and detect point sources. When matching the input and output catalogs, we use a matching radius of  $0''.5$ . As we put artificial point sources at random positions, some of them may be located close to real objects

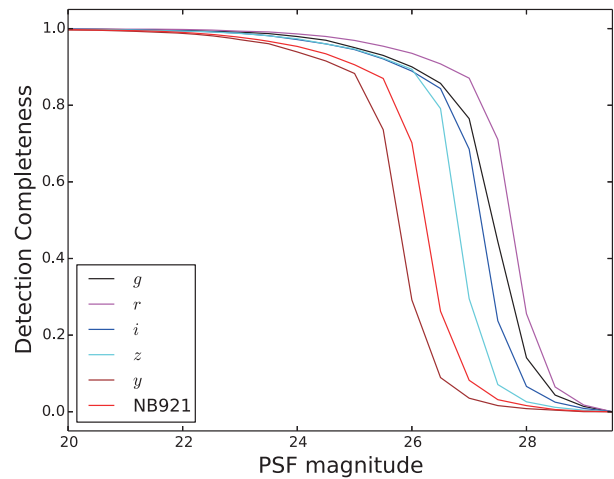

**Fig. 15.** Detection completeness as a function of magnitude in the central region of the COSMOS UltraDeep field (`tract = 9813`, `patch = 4,5`). The different colors show different filters, as indicated in the figure. Effects of random matching have been corrected for in this plot. (Color online)

and matched with them just by chance, even when an input object is too faint to be detected. We find that the probability of this random matching is about 10% (the exact number depends on the filter). We assume that the completeness at 30th magnitude, where we should find no matches, represents the random matching probability and we correct for it in the following discussion. To be specific, we apply

$$P_{\text{corr}} = (P - P_{\text{random}})/(1 - P_{\text{random}}), \quad (2)$$

where  $P$  is the measured matching probability,  $P_{\text{random}}$  is the random matching probability, and  $P_{\text{corr}}$  is the corrected probability.

Figure 15 shows the detection completeness in the central region of the COSMOS field. We are 80% complete for point sources at  $g \sim 26.8$ ,  $r \sim 27.2$ ,  $i \sim 26.6$ ,  $z \sim 26.5$ ,  $y \sim 25.3$ , and  $\text{NB921} \sim 25.7$ . The  $r$  band is the deepest band in COSMOS due to the superb seeing ( $\sim 0''.5$ ). Comparisons with the  $5\sigma$  magnitude limits quoted earlier suggest that the  $5\sigma$  limits correspond roughly to 50% completeness limits. For reference, we find that  $3\sigma$  and  $10\sigma$  limits estimated in the same way correspond to 15% and 85% detection completeness.

As a further test of the detection completeness, we compare the galaxy number counts as a function of magnitude with literature results. In addition to the pixel flags used in the previous section, we impose `classification_extendedness = 1` at  $i < 24.5$  to eliminate point sources. At fainter magnitudes, we assume all the sources are extended because galaxies significantly outnumber stars at such faint magnitudes at high latitudes. As we now focus on galaxies, we use the CModel photometry.

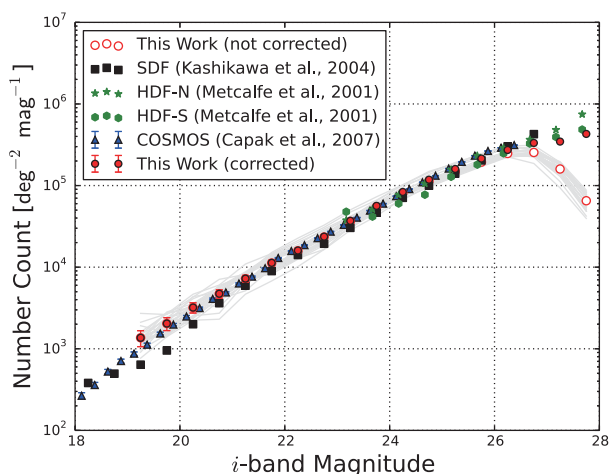

**Fig. 16.** Galaxy number counts in the  $i$  band. Open and solid circles show the raw and corrected galaxy number counts from the COSMOS UltraDeep catalog. The other symbols show the galaxy number counts from the literature (Metcalf et al. 2001; Kashikawa et al. 2004; Capak et al. 2007). The gray lines show the number counts in each patch. (Color online)

The open circles in figure 16 show the observed counts of galaxies in the  $i$  band, and they agree with the literature results (Metcalf et al. 2001; Kashikawa et al. 2004; Capak et al. 2007) down to  $i \sim 26.5$ . At fainter magnitudes, the completeness drops rapidly, which is consistent with figure 15. Using the completeness estimates, we can apply a correction to the observed galaxy counts to reconstruct the real counts. This is only a rough correction because we apply the completeness correction for point sources to galaxies. The filled circles in figure 16 show the corrected counts. The corrected galaxy counts agree reasonably well with HDF-S down to  $i \sim 28$ , suggesting that our completeness estimates are reasonable.

## 5.8 Known problems

As demonstrated in the previous section, our data are of high quality, but they are not without problems. In this section, we summarize known issues in our data. We will keep the list of known problems up to date at the data release site. We will continue to improve the pipeline to mitigate these problems for future data releases.

### 5.8.1 Disabled junk suppression

We often detect a large number of spurious sources in the outskirts of bright stars and galaxies because some pixels go above the detection threshold just by chance due to noise fluctuations in the presence of an elevated background. In order to suppress these spurious detections, we subtract the very local “sky” in the detection step. However, this junk suppression procedure was mistakenly left disabled in the main processing. It was turned on in the afterburner

processing (subsection 3.6) and users are encouraged to use the afterburner table in the database to reduce spurious sources. About 10% of the sources have been flagged as junk. They are mostly faint noise peaks, but photometry of parent objects may also be affected by the spurious sources as the afterburner only flags them and does not re-perform photometry. Photometry of bright objects or objects with extended outskirts should thus be handled with caution (see also galaxy shredding in sub-subsection 5.8.3).

### 5.8.2 Missing patches

Some of the patches are missing due to processing failures, which are in part caused by the disabled junk suppression and also by bright stars contaminating the patches. This results in holes in the survey footprint. To be specific, there are three missing patches in the Hectomap region in all the bands, and nearly a whole tract is missing in VVDS in the  $y$  band (tract 9936). These missing patches are summarized at the data release site.

### 5.8.3 Shredded bright galaxies

Large galaxies that have significant sub-structure are often overly deblended into many smaller objects. The fact that we did not enable junk suppression makes this even worse. This “shredding” of objects results in poor photometry because a significant fraction of light is assigned to the child objects. The effect is more severe for late-type galaxies than for early-type galaxies due to spiral arms and knots therein. Comparisons with the SDSS photometry show that, for bright ( $i < 19$ ) blue galaxies, about 15% of them suffer from shredding, half of which have their photometry underestimated by  $>0.25$  mag. Shredding is a larger problem for brighter sources with  $i \lesssim 18$ . In the future, we plan to use techniques similar to those used in the SDSS pipeline (Lupton et al. 2001) to identify such objects and remove the appropriate child objects from the blend.

### 5.8.4 Poor PSF modeling in good seeing areas

We are unable to model the PSF accurately for the visits with extremely good seeing, as already mentioned in subsection 3.7. The problem severely affected the  $i$  band in the VVDS field, and has been mitigated by reprocessing the data with these visits removed as a temporary solution. However, there are about 20 affected patches in the  $z$  band in VVDS ( $\sim 0.035$  square degrees, which is about 0.035% of the Wide data in this release). The other fields are also affected, though less severely. These bad patches should not be used for science analysis as the photometry is poor. They can be easily identified as having a large scatter and offset of the stellar sequence in color-color diagrams performed as part of the validation test in sub-subsection 5.3.2, and



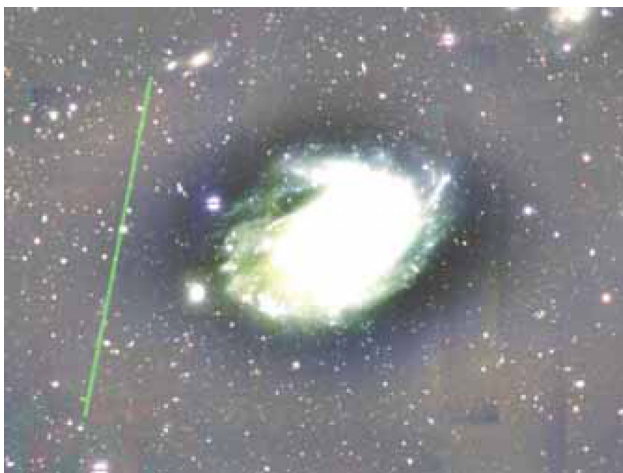

**Fig. 17.** Remaining satellite trail (the slanted line on the left) and the over-subtracted sky background around the large galaxy at the center. The level is stretched to enhance the background. The image is approximately  $9' \times 7'$ . (Color online)

these color scatter and offset values for each patch can be found in the `patch_qa` database table.

### 5.8.5 Over-subtracted sky around large objects

The sky around large objects with size  $\gtrsim 1'$  is often over-subtracted (figure 17). As described in the pipeline paper, we apply the background subtraction on a CCD-by-CCD basis using 128 pixel grids. The grid size is a trade-off between how well we subtract the sky on small scales and how well we keep the large-scale light profile of objects unaffected. The current choice is tuned for the former, and the outskirts of large objects are often misinterpreted as part of the sky, resulting in the over-subtraction. A new algorithm to subtract the sky using the entire field of view has been developed and it will improve the sky subtraction in our future releases.

### 5.8.6 Poor CModel photometry for large galaxies

Despite the galaxy shredding and over-subtraction of the sky, CModel tends to overestimate fluxes of large galaxies. Compared to the SDSS photometry in the  $i$  band, about 50% of bright ( $i < 19$ ) blue galaxies have overestimated CModel fluxes by  $-0.1$  to  $-0.7$  mag. In rare cases (2%), magnitude differences can be  $-0.7$  to  $-1.0$  mag. On the other hand, only  $\sim 20\%$  of galaxies with  $i < 19$  have consistent CModel photometry with SDSS within 0.05 mag. Although CModel photometry of red galaxies appears less biased, we still observe a large scatter and obtain similar numbers to the blue galaxies (e.g., only  $\sim 20\%$  have consistent photometry within 0.05 mag). The exact cause of this somewhat discrepant CModel photometry is being investigated. More extensive tests of the CModel photometry can be found in Huang et al. (2018).

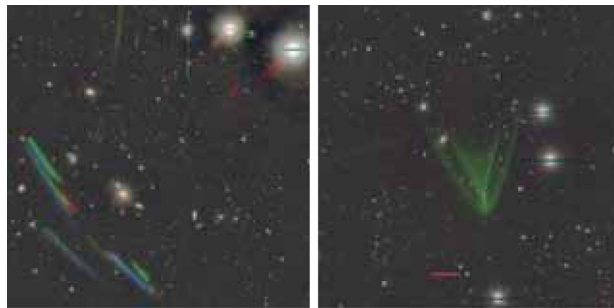

**Fig. 18.** Scattered light from nearby bright stars. (Color online)

### 5.8.7 Satellite trails

We detect and mask satellite trails by identifying outlying pixels in individual visits used in the coadd, but a fraction of satellite trails still remain unmasked (figure 17). This is more severe in the narrow bands, in which individual exposures are longer and we have fewer visits. This results in detected “objects” with nonsense colors and very high ellipticity, which can be used to reject them at a catalog level. But, users searching for objects detected in a small number of filters (e.g., Lyman  $\alpha$  emitters) should be careful and are advised to visually check the images. A satellite trail finder on a single exposure using a Hough transform is being developed. Also, difference imaging will be implemented as part of the processing in our future releases, allowing us to detect and reject satellite trails as they can be identified as residuals in difference images.

### 5.8.8 Ghosts and scattered light due to bright stars

Ghosts and scattered light due to bright stars are often left unmasked (figure 18). The frequency of these optical artifacts depends on the density of bright stars, but for reference, about 1%–2% of the area in UD-COSMOS is affected by ghosts and scattered light. The ghosts and scattered light, as well as the satellite trails mentioned above, are worse in the UltraDeep and Deep data than in Wide because of the small dithers. Cataloged objects that are located coherently on the sky over  $\gtrsim 1'$  should be taken with caution and should be visually checked. An algorithm to predict the location of ghosts from a list of bright stars is being developed. The difference imaging mentioned above will also reduce the ghosts in our future processing.

### 5.8.9 Overly conservative bright object masks

Objects close to bright stars are flagged (`flags_pixel_bright_object_{center,any}`) because they are likely to have bad photometry. We use a catalog of bright stars from Tycho-2 (Høg et al. 2000) and the bright object catalog from the Naval Observatory Merged Astrometric Dataset (NOMAD: Zacharias et al. 2005) in the current version. We mask objects brighter than 17.5 mag in any of



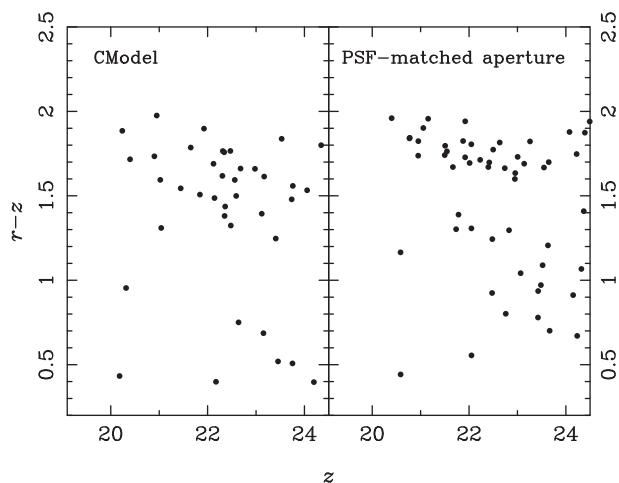

**Fig. 19.**  $r - z$  plotted against  $z$  for galaxies in the core of a redshift  $\sim 0.7$  cluster. The left and right panels are for CModel and afterburner photometry, respectively. Note the tighter red sequence in the right panel.

the  $BVR$  filters in these catalogs, which is approximately the saturation limit of the HSC data (see table 2). The current bright object masks may be overly conservative; e.g., a whole tract can be masked where there is a very bright (e.g.,  $\text{mag} < 5$ ) star, although many objects far from the stars are actually unaffected. Another known feature is that nearby bright galaxies are often misinterpreted as stars in the NOMAD catalog. About 8% of the masked objects are actually galaxies. It is advised not to use the bright object masks for studies of nearby galaxies. Improvements will be made in a future version of the pipeline.

#### 5.8.10 Deblending failure in crowded areas

The deblender tends to fail in very crowded areas such as the cores of galaxy clusters, resulting in poor photometry. This is a major problem for cluster science, especially at high redshifts, where clusters appear more compact. As described in subsection 3.6, PSF-matched aperture photometry is performed as part of the afterburner processing to mitigate the problem. A color–magnitude diagram of a  $z \sim 0.7$  cluster shown in figure 19 illustrates the improvement. The cluster red sequence has a large scatter in CModel, while it is tighter when the afterburner photometry is used. Users working on high-density environments should check if their objects are affected by this problem and use the afterburner photometry where appropriate.

#### 5.8.11 Underestimated flux uncertainties in the afterburner photometry

Flux uncertainties in the afterburner photometry are underestimated because significant covariances are introduced in the Gaussian smoothing process to match PSFs, and

they are not accounted for. The amount of underestimation depends on the difference between the target seeing and native seeing, but it can be a factor of several or larger. As a rough proxy, one could use flux uncertainties from the aperture photometry on the native PSF with the same aperture size.

#### 5.8.12 Incorrect prior weighting in CModel

The CModel galaxy-fitting algorithm utilizes a Bayesian prior on radius and ellipticity, largely as a way to regularize fits to low- $S/N$  and/or poorly resolved galaxies. When combining this with the likelihood to form the posterior probability (which is then maximized by the fitter), the relative weighting of these terms is incorrect, giving the prior much greater influence over the result than intended. This is essentially equivalent to utilizing a prior that decreases much more rapidly than it should at large radius or large ellipticity. As a result, CModel sizes and ellipticities are biased low, which almost certainly biases CModel fluxes low as well. The prior is only used when fitting the size and ellipticity, however, and this measurement is done in only one band (albeit a different one for each object) before performing forced photometry in all bands (see subsection 3.5). As a result, colors are much less affected by this bug. In fact, imposing such a strong penalty for large radii—even a physically unreasonable one—seems to decrease the number of catastrophic outliers in CModel colors. However, any galaxy photometry algorithm that operates on images with different PSFs in different bands can yield inconsistent colors if the model assumed for the galaxies is incorrect (as is always the case to some degree), and using the wrong prior can exacerbate this. We have not seen any evidence that incorrect prior weighting is degrading the colors significantly in this respect, but because we do not know the true distribution of colors, these tests are generally limited to comparisons with other flux measures and experiments on simulations (Huang et al. 2018). A more complete description of this problem can be found in Bosch et al. (2018).

#### 5.8.13 Poor astrometry in the corner of the UltraDeep COSMOS field

The southeast corner of the UltraDeep COSMOS field has an astrometric error in the  $z$  band, likely introduced by a bad astrometric fit in the mosaic process. Only a few patches suffer from the poor astrometry, but these patches should not be used for science. See the online document for a list of the patches that are affected.

#### 5.8.14 Residual background in the $y$ band

The  $y$  band suffers from scattered light and it was not removed very well in the sky subtraction, leaving arc/linear

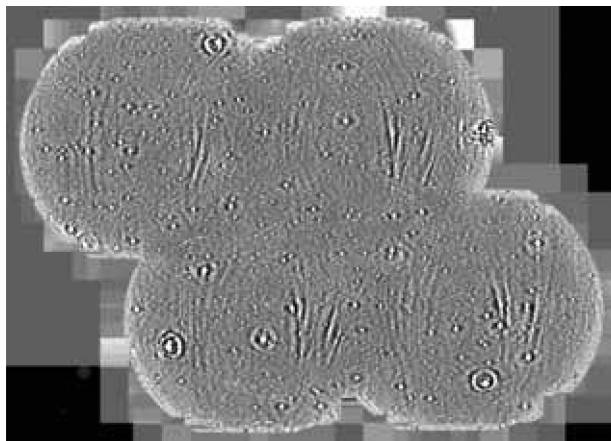

**Fig. 20.**  $y$ -band coadd image of DEEP2-3 field. The level is stretched to enhance the background features. The image is approximately  $4^\circ$  by  $3^\circ$ .

features with both positive and negative fluxes in the coadds. Figure 20 shows the  $y$ -band image of the DEEP2-3 field. The level is strongly stretched to enhance the features. These features are most prominent in the Deep and Ultra-Deep fields where we apply small dithers, but can also be seen in the Wide layer. The amplitude of the feature varies, but roughly  $\pm 0.1$  DN per pixel (note that the zero-point is  $27 \text{ mag DN}^{-1}$ ). Sources close to these features may have poor photometry due to the improper background subtraction. We have identified the source of the scattered light and are working on improved removal of the feature.

#### 5.8.15 Shallow $i$ -band depth in the COSMOS Wide-depth median stack

The COSMOS Wide-depth stacks can be used for various tests, but we discovered that one of the visits used for the median seeing stack in the  $i$  band had a guiding error and the visit was actually not included in the coadd. As a result, we have shallower  $i$ -band data than the Wide depth by  $0.16 \text{ mag}$  (the integration is  $15 \text{ min}$  as opposed to  $20 \text{ min}$ ). For many tests, a depth change at a level of  $0.1\text{--}0.2 \text{ mag}$  does not significantly matter, but it can be a major problem for tests around the detection limits. The problem exists only in the median seeing stack, and the other stacks are unaffected.

#### 5.8.16 BAD and CR flags do not propagate to the coadds

When making coadds we ignore pixels with BAD or CR set. However, we neglected to set the corresponding mask bits on the coadd to indicate that we have done this. We also did not set any mask bit on the coadd for regions that are at the boundary of CCDs. This problem makes our coadded PSF model inconsistent with images in these areas, since the coadded PSF model does not account for the fact that these pixels were excluded in the coadd. The same is true

for pixels removed with safe clipping algorithms, and the CLIPPED flag can be helpful to filter these pixels. We have already found some discrepancies between the coadd PSFs and the per-visit PSFs. The effects of this problem are still under investigation and we will report the results at the data release site.

## 6 Catalog and data archives

The processed images and catalogs are both made available in this data release, and this section briefly describes the functionality of our dedicated database and user interfaces. Details of the database can be found in T. Takata et al. (in preparation). The current design of our data distribution scheme is similar to that of SDSS—catalog data can be retrieved from PostgreSQL database servers, while custom-designed user interfaces allow users to retrieve binary data such as images. We discuss each of the catalog and data archive servers in what follows.

### 6.1 Catalogs

The catalog data are stored in PostgreSQL database tables and can be retrieved with SQL scripts. Each of the Wide, Deep, and UltraDeep layers has its own schema and `meas` (unforced), `forced`, and `afterburner` tables, and a number of metatables are available for each. As we have mentioned earlier, we have some issues with the data such as poor photometry in a very small number of patches. The `patch_qa` table can be used to identify these problematic patches. It also gives approximate depths ( $5\sigma$  limiting magnitudes for point sources) as well as the seeing sizes for each filter and for each patch. The schema browser should be referred to for details of the table columns. The online SQL editor provides an easy environment to write, check, and submit SQL queries. In addition, queries can be sent from a local client using a Python-based script, which will be useful for sequential data retrieval.

### 6.2 Binary data

The image files described in section 4, both individual CCDs and coadds, are available for direct download. As mentioned in subsection 2.1, some of the catalog FITS files will be released in a future incremental release. There is an online search tool to find files by constraining, e.g., filters and coordinates. As patch images are large, an image cutout interface is also available to generate postage stamps of objects by uploading a coordinate list.

In addition to the binary data, we offer a browser-based image viewer, `hscMap`. A user can pan and zoom in and out of the HSC images, change the filter combination for

color composites, and tweak flux levels. Both the standard RGB color scheme and the SDSS color scheme (Lupton et al. 2004) are available. hscMap accepts a user catalog to mark objects in the browser. Also, it talks to the database and a catalog can be retrieved from the database and loaded into the browser. More useful functions in hscMap are described in the online manual.

### 6.3 Acknowledging the HSC data

For any scientific publications based on the HSC-SSP data, please quote the first four paragraphs in the acknowledgment section of this paper. In addition, the following publications should be referred to where appropriate: the survey design paper (Aihara et al. 2018); Miyazaki et al. (2018) for the camera system; Komiyama et al. (2018) for the camera dewar; Kawanomoto et al. (2017) for the filter response functions; Bosch et al. (2018) for the processing pipeline; T. Takata et al. (in preparation) for the database; Furusawa et al. (2018) for the on-site system; Tanaka et al. (2018) for photometric redshifts; Mandelbaum et al. (2018) for the lensing shear catalog; Huang et al. (2018) for SynPipe; and this paper for the public data. The pipeline is developed as part of LSST and therefore LSST should be referenced, too: Ivezić et al. (2008), Axelrod et al. (2010), and Jurić et al. (2015). We have calibrated our data against an early version of the Pan-STARRS data and this release would not have been possible without it. We would like to encourage users to reference Pan-STARRS as well: Schlafly et al. (2012), Tonry et al. (2012), and Magnier et al. (2013).

### 7 Future releases

Our current plan is to make major data releases every two years: DR2 in 2019 and DR3 in 2021. Each of these future releases will include data from more than 100 additional nights, and we expect to make major improvements in the data quality as well as in the data retrieval tools.

In addition to these major data releases, we will make incremental data releases, likely once or twice a year. Incremental releases are intended to deliver data products to add value to the current major data release, not to increase the area. The first incremental release happened in 2017 June, and it included joint COSMOS data by HSC-SSP and the University of Hawaii (Tanaka et al. 2017) and photo- $z$  products for the Wide layer (Tanaka et al. 2018). Another incremental release is planned and will include fully validated shape measurements for weak lensing. There are two surveys that are collaborating with us by obtaining deep observations in the HSC-SSP fields. The CFHT Large Area

U-band Deep Survey (CLAUDS: M. Sawicki et al. in preparation) has recently obtained very deep  $u$ -band imaging over 20 square degrees of the Deep and UltraDeep layers to HSC-matched depths ( $\sim 27.0$  mag,  $5\sigma$  in  $2''$  apertures); these observations are complete and the data are being processed. Additionally, Steward Observatory is leading a near-IR  $JHK$  imaging campaign with UKIRT. In the future, we plan to release  $u$ -band and near-IR enhanced products in collaboration with our CLAUDS and Steward partners.

Updates of the user interfaces and data retrieval tools are also within the scope of an incremental release. Currently, the catalog archive (i.e., database) and the data archive (i.e., flat files) are somewhat separate, but a Python environment that will allow users to retrieve catalog products and image products in the same fashion is being developed. A major upgrade of hscMap is in progress, and users will be able to control hscMap from the console, which is a very powerful feature when combined with the Python environment. Also, we plan to allow users to make their own tables on our database, so that they can join their tables with the main database tables.

We note that an incremental release may happen without any publications (e.g., if only the data retrieval tools are updated), and users are encouraged to check our website regularly. Registered users of the data release site will be notified.

### 8 Summary

We have presented the first data release of HSC-SSP. The release includes data from the first 61.5 nights of the survey and covers over 100 square degrees of the Wide area and  $\sim 30$  square degrees of the Deep and UltraDeep area. We have processed the data with a version of the LSST stack, hscPipe, and demonstrated the quality of our data; we achieve 1%–2% PSF photometry and  $\sim 10/40$  mas internal/external astrometry, and we reach  $i \sim 26.4$ ,  $\sim 26.5$ , and  $\sim 27.0$  in the Wide, Deep, and UltraDeep layers, respectively. These are the depths thus far, and we will go even deeper in the Deep and UltraDeep layers. There are a number of known issues in the data, but we have plans to fix them in our future releases. The processed images and catalogs are served to the community through dedicated databases and user interfaces, allowing users to retrieve the data easily. Only a brief outline of the data products is given in this paper, but more detailed information can be found at the data release site, as well as in companion papers.

We plan to make incremental data releases to enhance the scientific value of this data release. The first incremental release has happened already, as mentioned above, and we plan to make another one to release detailed shape measurements. In the longer term, we will make two more major

data releases as the survey progresses, each of which will include an additional >100 nights of data. We hope to make significant improvements in the data quality as well as in the database and user interfaces for the community to fully exploit even larger sets of HSC data.

## Acknowledgments

The Hyper Suprime-Cam (HSC) collaboration includes the astronomical communities of Japan and Taiwan, and Princeton University. The HSC instrumentation and software were developed by the National Astronomical Observatory of Japan (NAOJ), the Kavli Institute for the Physics and Mathematics of the Universe (Kavli IPMU), the University of Tokyo, the High Energy Accelerator Research Organization (KEK), the Academia Sinica Institute for Astronomy and Astrophysics in Taiwan (ASIAA), and Princeton University. Funding was contributed by the FIRST program from the Japanese Cabinet Office, the Ministry of Education, Culture, Sports, Science and Technology (MEXT), the Japan Society for the Promotion of Science (JSPS), the Japan Science and Technology Agency (JST), the Toray Science Foundation, NAOJ, Kavli IPMU, KEK, ASIAA, and Princeton University.

This paper makes use of software developed for the Large Synoptic Survey Telescope. We thank the LSST Project for making their code available as free software at <http://dm.lsst.org>.

The Pan-STARRS1 Surveys have been made possible through contributions of the Institute for Astronomy, the University of Hawaii, the Pan-STARRS Project Office, the Max-Planck Society and its participating institutes, the Max Planck Institute for Astronomy, Heidelberg and the Max Planck Institute for Extraterrestrial Physics, Garching, The Johns Hopkins University, Durham University, the University of Edinburgh, Queen's University Belfast, the Harvard-Smithsonian Center for Astrophysics, the Las Cumbres Observatory Global Telescope Network Incorporated, the National Central University of Taiwan, the Space Telescope Science Institute, the National Aeronautics and Space Administration under Grant No. NNX08AR22G issued through the Planetary Science Division of the NASA Science Mission Directorate, the National Science Foundation under Grant No. AST-1238877, the University of Maryland, Eotvos Lorand University (ELTE), and the Los Alamos National Laboratory.

This paper is based on data collected at the Subaru Telescope and retrieved from the HSC data archive system, which is operated by the Subaru Telescope and Astronomy Data Center at the National Astronomical Observatory of Japan.

We thank the anonymous referee for a useful report, which helped to improve the paper.

This work is also based on zCOSMOS observations carried out using the Very Large Telescope at the ESO Paranal Observatory under Program ID: LP175.A-0839, on observations taken by the 3D-HST Treasury Program (GO 12177 and 12328) with the NASA/ESA HST, which is operated by the Association of Universities for Research in Astronomy, Inc., under NASA contract NAS5-26555, on data from the VIMOS VLT Deep Survey, obtained from the VVDS database operated by Cesam, Laboratoire d'Astrophysique de Marseille, France, on data from the VIMOS Public Extragalactic Redshift Survey (VIPERS). VIPERS has been performed using the ESO Very Large Telescope, under Large Program 182.A-0886. The participating institutions and funding agencies are listed at <http://vipers.inaf.it>. Funding for SDSS-III has been provided by the Alfred P. Sloan Foundation, the Participating Institutions,

the National Science Foundation, and the US Department of Energy Office of Science. The SDSS-III web site is <http://www.sdss3.org/>. SDSS-III is managed by the Astrophysical Research Consortium for the Participating Institutions of the SDSS-III Collaboration including the University of Arizona, the Brazilian Participation Group, Brookhaven National Laboratory, Carnegie Mellon University, University of Florida, the French Participation Group, the German Participation Group, Harvard University, the Instituto de Astrofísica de Canarias, the Michigan State/Notre Dame/JINA Participation Group, Johns Hopkins University, Lawrence Berkeley National Laboratory, Max Planck Institute for Astrophysics, Max Planck Institute for Extraterrestrial Physics, New Mexico State University, New York University, Ohio State University, Pennsylvania State University, University of Portsmouth, Princeton University, the Spanish Participation Group, University of Tokyo, University of Utah, Vanderbilt University, University of Virginia, University of Washington, and Yale University. GAMA is a joint European-Australasian project based around a spectroscopic campaign using the Anglo-Australian Telescope. The GAMA input catalog is based on data taken from the Sloan Digital Sky Survey and the UKIRT Infrared Deep Sky Survey. Complementary imaging of the GAMA regions is being obtained by a number of independent survey programs including GALEX MIS, VST KiDS, VISTA VIKING, WISE, Herschel-ATLAS, GMRT, and ASKAP, providing UV to radio coverage. GAMA is funded by the STFC (UK), the ARC (Australia), the AAO, and the participating institutions. The GAMA website is <http://www.gama-survey.org/>. Funding for the DEEP2 Galaxy Redshift Survey has been provided by NSF grants AST-95-09298, AST-0071048, AST-0507428, and AST-0507483, as well as NASA LTSA grant NNG04GC89G. Funding for PRIMUS is provided by NSF (AST-0607701, AST-0908246, AST-0908442, AST-0908354) and NASA (Spitzer-1356708, 08-ADP08-0019, NNX09AC95G). HM is supported by the Jet Propulsion Laboratory, California Institute of Technology, under a contract with the National Aeronautics and Space Administration. This work is in part supported by MEXT Grant-in-Aid for Scientific Research on Innovative Areas (Nos. 15H05887, 15H05892, 15H05893).

## References

- Abazajian, K., et al. 2004, *AJ*, 128, 502  
 Ahn, C. P., et al. 2012, *ApJS*, 203, 21  
 Aihara, H., et al. 2018, *PASJ*, 70, S4  
 Alam, S., et al. 2015, *ApJS*, 219, 12  
 Antilogus, P., Astier, P., Doherty, P., Guyonnet, A., & Regnault, N. 2014, *J. Instrum.*, 9, C03048  
 Axelrod, T., Kantor, J., Lupton, R. H., & Pierfederici, F. 2010, in *Proc. SPIE*, 7740, Software and Cyberinfrastructure for Astronomy, ed. N. M. Radziwill & A. Bridger (Bellingham, WA: SPIE), 774015  
 Berghea, C. T., et al. 2016, *AJ*, 152, 53  
 Bernstein, G. M., & Jarvis, M. 2002, *AJ*, 123, 583  
 Bertin, E. 2011, in *ASP Conf. Ser.*, 442, *Astronomical Data Analysis Software and Systems XX*, ed. I. N. Evans et al. (San Francisco: ASP), 435  
 Bickerton, S. J., & Lupton, R. H. 2013, *MNRAS*, 431, 1275  
 Bosch, J., et al. 2018, *PASJ*, 70, S5  
 Bradshaw, E. J., et al. 2013, *MNRAS*, 433, 194  
 Capak, P., et al. 2007, *ApJS*, 172, 99



- Chambers, K. C., et al. 2016, [arXiv:1612.05560](https://arxiv.org/abs/1612.05560)
- Coil, A. L., et al. 2011, *ApJ*, 741, 8
- Cool, R. J., et al. 2013, *ApJ*, 767, 118
- Dark Energy Survey Collaboration, 2016, *MNRAS*, 460, 1270
- Davis, M., et al. 2003, in *Proc. SPIE*, 4834, Discoveries and Research Prospects from 6- to 10-Meter-Class Telescopes II, ed. P. Guhathakurta (Bellingham, WA: SPIE), 161
- de Jong, J. T. A., et al. 2017, *A&A*, 604, A134
- Drinkwater, M. J., et al. 2010, *MNRAS*, 401, 1429
- Finkbeiner, D. P., et al. 2016, *ApJ*, 822, 66
- Furusawa, H., et al. 2018, *PASJ*, 70, S3
- Garilli, B., et al. 2014, *A&A*, 562, A23
- Geller, M. J., Diaferio, A., & Kurtz, M. J. 2011, *AJ*, 142, 133
- Gunn, J. E., & Stryker, L. L. 1983, *ApJS*, 52, 121
- Høg, E., et al. 2000, *A&A*, 355, L27
- Huang, S., et al. 2018, *PASJ*, 70, S6
- Ivezic, Z., et al. 2008, [arXiv:0805.2366](https://arxiv.org/abs/0805.2366)
- Jarvis, M., et al. 2016, *MNRAS*, 460, 2245
- Jurić, M., et al. 2015, [arXiv:1512.07914](https://arxiv.org/abs/1512.07914)
- Kashikawa, N., et al. 2004, *PASJ*, 56, 1011
- Kawanomoto, S., et al. 2017, *PASJ*, submitted
- Komiyama, Y., et al. 2018, *PASJ* 70, S2
- Kron, R. G. 1980, *ApJS*, 43, 305
- Kuijken, K., et al. 2015, *MNRAS*, 454, 3500
- Le Fèvre, O., et al. 2013, *A&A*, 559, A14
- Leauthaud, A., et al. 2007, *ApJS*, 172, 219
- Lilly, S. J., et al. 2009, *ApJS*, 184, 218
- Liske, J., et al. 2015, *MNRAS*, 452, 2087
- Lupton, R. H., et al. 2001, SDSS Image Processing II: The Photo Pipelines (<https://www.astro.princeton.edu/~rhl/photo-lite.pdf>)
- Lupton, R., Blanton, M. R., Fekete, G., Hogg, D. W., O'Mullane, W., Szalay, A., & Wherry, N. 2004, *PASP*, 116, 133
- McLure, R. J., et al. 2013, *MNRAS*, 428, 1088
- Magnier, E. A., et al. 2013, *ApJS*, 205, 20
- Mandelbaum, R., et al. 2018, *PASJ*, 70, S25
- Metcalfe, N., Shanks, T., Campos, A., McCracken, H. J., & Fong, R. 2001, *MNRAS*, 323, 795
- Miyazaki, S., et al. 2012, in *Proc. SPIE*, 8446, Ground-based and Airborne Instrumentation for Astronomy IV, ed. I. S. McLean et al. (Bellingham, WA: SPIE), 84460Z
- Miyazaki, S., et al. 2018, *PASJ*, 70, S1
- Momcheva, I. G., et al. 2016, *ApJS*, 225, 27
- Newman, J. A., et al. 2013, *ApJS*, 208, 5
- Oguri, M., et al. 2018, *PASJ*, 70, S20
- Padmanabhan, N., et al. 2008, *ApJ*, 674, 1217
- Rowe, B. T. P., et al. 2015, *Astron. Comput.*, 10, 121
- Schlafly, E. F., et al. 2012, *ApJ*, 756, 158
- Schlegel, D. J., Finkbeiner, D. P., & Davis, M. 1998, *ApJ*, 500, 525
- Scoville, N., et al. 2007, *ApJS*, 172, 1
- Silverman, J. D., et al. 2015, *ApJS*, 220, 12
- Skelton, R. E., et al. 2014, *ApJS*, 214, 24
- Tanaka, M., et al. 2017, [arXiv:1706.00566](https://arxiv.org/abs/1706.00566)
- Tanaka, M., et al. 2018, *PASJ*, 70, S9
- Tholen, D. J., Micheli, M., & Elliott, G. T. 2013, *Icarus*, 223, 625
- Tonry, J. L., et al. 2012, *ApJ*, 750, 99
- Zacharias, N., Monet, D. G., Levine, S. E., Urban, S. E., Gaume, R., & Wycoff, G. L. 2005, *VizieR Online Data Catalog*, I/297
